# Supplementary material for: Synthesis of poly-functionalized imidazoles via vinyl azides annulation
Source: Royal Society of Chemistry journal article supplement (doi:10.1039/c5ra07320k), 2015-01-01

## Synthesis of Poly-functionalized Imidazoles *via* Vinyl Azides Participated Annulation

Jing Luo,<sup>†</sup> Wenteng Chen,<sup>†</sup> Jiaan Shao, Xingyu Liu, Ke Shu, Pai Tang,  
Yongping Yu\*

Zhejiang Province Key Laboratory of Anti-Cancer Drug Research, College  
of Pharmaceutical Science, Zhejiang University, 866 Yuhangtang Road,  
Zijin Campus, Hangzhou 310058, China

<sup>†</sup> Jing Luo and Wenteng Chen contributed equally to this work.

\* Corresponding author, E-mail: [yyu@zju.edu.cn](mailto:yyu@zju.edu.cn); Tel: +86-571-88208452.

### Supporting Information

#### List of Contents

|                                                       |         |
|-------------------------------------------------------|---------|
| General Information.....                              | S2      |
| General procedure for the Synthesis of <b>3</b> ..... | S2      |
| Characterization Data of <b>3</b> .....               | S2-S8   |
| X-ray Crystallography Data of <b>3g</b> .....         | S9      |
| NMR spectra of <b>3</b> .....                         | S10-S28 |

## General Information

All solvents were purified according to standard methods prior to use. Purifications of products were carried out by chromatography using silica gel (200-300 mesh). Melting points were recorded on a BÜCHI B-540 melting point apparatus. NMR spectra were recorded on a Bruker DRX-500 [Bruker Biospin, Germany] and Mercury plus Varian 300MHz. NMR spectra were recorded for  $^1\text{H}$  NMR at 500 MHz and for  $^{13}\text{C}$  NMR at 125 MHz. For  $^1\text{H}$  NMR, tetramethylsilane (TMS) served as internal standard ( $\delta=0$ ) and data are reported as follows: chemical shift, integration, multiplicity (s = singlet, d = doublet, t = triplet, q = quartet, m = multiplet), and coupling constant(s) in Hz. For  $^{13}\text{C}$  NMR, TMS ( $\delta=0$ ) or  $\text{CDCl}_3$  ( $\delta=77.26$ ) was used as internal standard and spectra were obtained with complete proton decoupling. HPLC analysis and the HRMS of all biologically evaluated compounds was confirmed on a Agilent 1290 HPLC-6224 Time of Flight Mass Spectrometer using PhenomenexLuna  $5\mu$  C18, 100 Å,  $150 \times 4.60$  mm 5 micron column at a flow rate of 0.5 mL/min using liner gradients buffer B in A (B:  $\text{CH}_3\text{OH}$  containing 0.1 % formic acid, A:  $\text{H}_2\text{O}$  containing 0.1% formic acid). Mobile phase B was increased linearly from 5% to 95% over 7 min and 95% over the next 2 min, after which the column was equilibrated to 5% for 1 min.

The starting material **1** and **2** were prepared according to literature methods.<sup>1, 2</sup>

## References:

1. Chiba, S.; Wang, Y.-F.; Lapointe, G.; Narasaka, K. *Org. Lett.* **2008**, 10, 313.
2. Caron, S.; Wei, L.; Douville, J.; Ghosh, A. *J. Org. Chem.* **2010**, 75, 945.

## General Procedure for the Synthesis of **3**

A mixture of vinyl azide **1** (0.1 mmol), imidate or thioamidium **2** (0.11 mmol, 1.1 equiv) was stirred in *t*-BuOH (1.0 mL) in a sealed tube at 110 °C for 8 h. After the completeness of the reaction, the mixture was cooled down to room temperature and diluted with water, extracted three times with EtOAc ( $3 \times 10$  mL). The combined organic extracts were washed with brine, dried over  $\text{Na}_2\text{SO}_4$ , concentrated and purified by flash chromatography (DCM/MeOH) on silica gel to afford **3**.

## Characterization Data

### Ethyl 2, 4-diphenyl-1*H*-imidazole-5-carboxylate (**3a**)

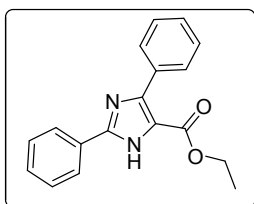

Yellow solid, m.p. 158.9-159.1 °C; Yield: 269 mg (92%);  $^1\text{H}$  NMR (500 MHz,  $\text{CDCl}_3$ )  $\delta$ 10.43 (s, 1H), 7.97 (m, 4H), 7.48-7.36 (m, 6H), 4.33 (q,  $J = 6.4$  Hz, 2H), 1.30 (t,  $J = 6.4$  Hz, 3H);  $^{13}\text{C}$  NMR

(125 MHz, CDCl<sub>3</sub>)  $\delta$  160.8, 148.1, 133.6, 130.0, 129.6, 129.2, 129.0, 128.7, 128.0, 126.3, 119.0, 61.2, 14.3. HRMS (ESI) calcd. for C<sub>18</sub>H<sub>17</sub>N<sub>2</sub>O<sub>2</sub> [M+H]<sup>+</sup> = 293.1285, found 293.1285.

**Ethyl 2-methyl-4-phenyl-1H-imidazole-5-carboxylate (3b)**

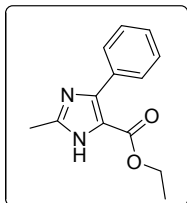

Yellow oil; Yield: 159 mg (69%); <sup>1</sup>H NMR (500 MHz, CDCl<sub>3</sub>)  $\delta$  7.59 (dd, *J* = 7.7, 1.7 Hz, 2H), 7.22-7.16 (m, 3H), 4.10 (q, *J* = 7.1 Hz, 2H), 2.09 (s, 3H), 1.07 (t, *J* = 7.1 Hz, 3H). <sup>13</sup>C NMR (125 MHz, CDCl<sub>3</sub>)  $\delta$  162.1, 146.4, 142.5, 131.5, 129.2, 128.3, 127.8, 122.0, 60.4, 14.0, 13.3. HRMS (ESI) calcd. for C<sub>13</sub>H<sub>15</sub>N<sub>2</sub>O<sub>2</sub>[M+H]<sup>+</sup> = 231.1128, found 231.1128.

**Ethyl 4-(4-methoxyphenyl)-2-phenyl-1H-imidazole-5-carboxylate (3c):**

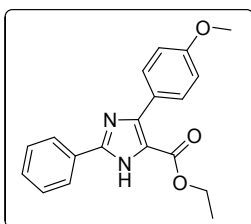

Yellow solid, m.p. 122.9-123.3 °C; Yield: 258 mg (80%); <sup>1</sup>H NMR (500 MHz, CDCl<sub>3</sub>)  $\delta$  10.18 (s, 1H), 7.97 (m, 3H), 7.48-7.36 (m, 6H), 4.35 (q, *J* = 7.1 Hz, 2H), 1.69 (s, 3H), 1.33 (t, *J* = 7.1 Hz, 3H); <sup>13</sup>C NMR (125 MHz, CDCl<sub>3</sub>)  $\delta$  164.2, 162.1, 158.8, 138.0, 131.2, 126.4, 123.3, 121.8, 114.1, 112.2, 109.0, 93.7, 60.8, 55.4, 14.4. HRMS (ESI) calcd for C<sub>19</sub>H<sub>19</sub>N<sub>2</sub>O<sub>3</sub> [M+H]<sup>+</sup> = 323.1390, found 323.1391.

**Ethyl 4-(4-methoxyphenyl)-2-methyl-1H-imidazole-5-carboxylate (3d):**

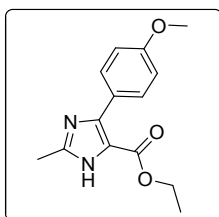

Yellow oil; Yield: 177 mg (68%); <sup>1</sup>H NMR (500 MHz, CDCl<sub>3</sub>)  $\delta$  7.70 (d, *J* = 8.7 Hz, 2H), 6.88-6.83 (m, 2H), 4.24 (q, *J* = 7.1 Hz, 2H), 3.78 (s, 3H), 2.28 (s, 3H), 1.23 (t, *J* = 7.1 Hz, 3H); <sup>13</sup>C NMR (125 MHz, CDCl<sub>3</sub>)  $\delta$  161.9, 159.9, 146.2, 130.6, 124.5, 113.4, 60.6, 55.4, 14.3, 13.9. HRMS (ESI) calcd. for C<sub>14</sub>H<sub>17</sub>N<sub>2</sub>O<sub>3</sub>[M+H]<sup>+</sup> = 261.1234, found 261.1234;

**Ethyl 4-(benzo[d][1,3]dioxol-5-yl)-2-phenyl-1H-imidazole-5-carboxylate (3e):**

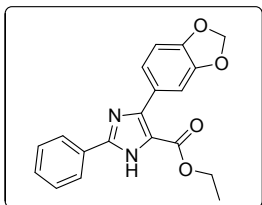

Yellow solid, m.p. 202.5-202.8 °C; Yield: 221 mg (66%); <sup>1</sup>H NMR (500 MHz, CDCl<sub>3</sub>) δ 10.01 (s, 1H), 7.95 (d, *J* = 6.8 Hz, 2H), 7.49-7.43 (m, 5H), 6.87 (d, *J* = 8.1 Hz, 1H), 6.00 (s, 2H), 4.37 (q, *J* = 7.1 Hz, 2H), 1.36 (t, *J* = 7.1 Hz, 3H); <sup>13</sup>C NMR (125 MHz, CDCl<sub>3</sub>) δ 148.1, 147.5, 1230.1, 129.2, 129.1, 126.1, 123.8, 122.3, 118.3, 110.2, 108.1, 101.3, 61.2, 14.5. HRMS (ESI) calcd. for C<sub>19</sub>H<sub>17</sub>N<sub>2</sub>O<sub>4</sub> [M+H]<sup>+</sup> = 337.1183, found 337.1184.

**Ethyl 4-(4-bromophenyl)-2-phenyl-1H-imidazole-5-carboxylate (3f):**

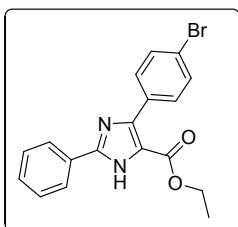

Yellow solid, m.p. 159.0-159.3 °C; Yield: 344 mg (93%); <sup>1</sup>H NMR (500 MHz, CDCl<sub>3</sub>) δ 10.23 (s, 1H), 7.96 (d, *J* = 6.7 Hz, 2H), 7.88 (m, 2H), 7.55 (d, *J* = 8.4 Hz, 2H), 7.47 (d, *J* = 7.3 Hz, 3H), 4.36 (q, *J* = 7.1 Hz, 2H), 1.34 (t, *J* = 7.1 Hz, 3H). <sup>13</sup>C NMR (125 MHz, CDCl<sub>3</sub>) δ 163.0, 148.1, 132.0, 130.3, 130.1, 129.7, 129.1, 128.4, 126.0, 124.2, 123.5, 123.1, 61.5, 14.3. HRMS (ESI) calcd for C<sub>18</sub>H<sub>16</sub>BrN<sub>2</sub>O<sub>2</sub> [M+H]<sup>+</sup> = 371.0390, found 371.0392.

**Ethyl 4-(4-bromophenyl)-2-methyl-1H-imidazole-5-carboxylate (3g):**

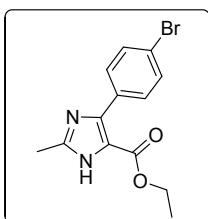

Yellow solid, m.p. 137.3-137.5 °C. Yield: 271 mg (88%); <sup>1</sup>H NMR (400 MHz, CDCl<sub>3</sub>) δ 8.32 (d, *J* = 8.3 Hz, 2H), 7.69 (d, *J* = 8.3 Hz, 2H), 7.47-7.45 (m, 2H), 7.41-7.38 (m, 2H), 7.35-7.33 (m, 1H), 7.31 (d, *J* = 7.8 Hz, 1H), 7.22 (d, *J* = 8.0 Hz, 2H), 7.15-7.13 (m, 1H), 7.08 (d, *J* = 8.0 Hz, 2H), 5.11 (s, 2H), 3.73 (s, 2H), 3.59 (s, 3H). <sup>13</sup>C NMR (100 MHz, CDCl<sub>3</sub>) δ 168.4, 158.3, 147.2, 146.0, 142.1, 136.8, 130.4, 130.0, 129.3, 128.9, 128.6, 128.0, 127.8, 127.7, 127.6, 127.4, 124.2, 119.1, 115.3, 70.0, 51.9. HRMS (ESI) calcd. for C<sub>27</sub>H<sub>23</sub>N<sub>2</sub>O<sub>5</sub> [M+H]<sup>+</sup> = 455.1601, found 455.1601.

**Ethyl 4-(furan-2-yl)-2-phenyl-1H-imidazole-5-carboxylate (3i):**

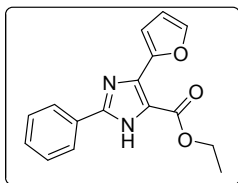

Yellow solid, m.p. 117.7-118.0 °C; Yield: 155 mg (55%); <sup>1</sup>H NMR (500 MHz, CDCl<sub>3</sub>) δ 10.19 (s, 1H), 7.98 (m, 3H), 7.44 (m, 5H), 4.35 (q, *J* = 7.1 Hz, 2H), 1.33 (t, *J* = 7.1 Hz, 3H); <sup>13</sup>C NMR (125 MHz, CDCl<sub>3</sub>) δ 160.4, 148.3, 147.7, 133.3, 129.9, 129.4, 129.0, 128.9, 128.5, 127.8, 126.0, 118.5, 61.1, 14.2. HRMS (ESI) calcd. for C<sub>16</sub>H<sub>15</sub>N<sub>2</sub>O<sub>3</sub> [M+H]<sup>+</sup> = 283.1077, found 283.1077.

**2-Methyl-4-phenyl-1H-imidazole-5-carbaldehyde (3k):**

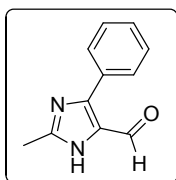

Yellow solid, m.p. 164.9-165.2 °C; Yield: 52 mg (28%); <sup>1</sup>H NMR (500 MHz, CDCl<sub>3</sub>) δ 10.04 (s, 1H), 8.19-8.09 (m, 2H), 7.46-7.37 (m, 3H), 7.09 (s, 1H), 2.40 (s, 3H); <sup>13</sup>C NMR (125 MHz, CDCl<sub>3</sub>) δ 173.6, 161.2, 139.7, 134.1, 132.4, 130.6, 129.0, 128.0, 16.8. HRMS (ESI) calcd. for C<sub>11</sub>H<sub>11</sub>N<sub>2</sub>O [M+H]<sup>+</sup> = 187.0866, found 187.0866.

**(4-Isopropyl-2-methyl-1H-imidazol-5-yl)(phenyl)methanone (3l):**

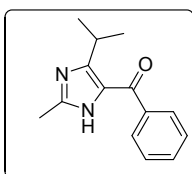

Yellow solid, m.p. 95.8-96.2 °C; Yield: 217 mg (95%); <sup>1</sup>H NMR (500 MHz, CDCl<sub>3</sub>) δ 7.87 (s, 2H), 7.53 (t, *J* = 7.3 Hz, 1H), 7.45 (t, *J* = 7.4 Hz, 2H), 3.71 (d, *J* = 7.0 Hz, 1H), 2.42 (s, 3H), 1.21 (d, *J* = 6.8 Hz, 6H). <sup>13</sup>C NMR (125 MHz, CDCl<sub>3</sub>) δ 188.7, 145.8, 139.4, 132.0, 129.3, 128.2, 26.2, 22.3, 14.2. HRMS (ESI) calcd. for C<sub>14</sub>H<sub>17</sub>N<sub>2</sub>O [M+H]<sup>+</sup> = 229.1335, found 229.1337.

**(2-Methyl-1H-imidazol-5-yl)(morpholino)methanone (3m):**

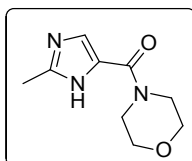

Yellow solid, m.p.174.1-174.3 °C; Yield: 176 mg (90%); <sup>1</sup>H NMR (500 MHz, DMSO-d6) δ 12.21 (s, 1H), 7.46 (s, 1H), 4.11 -4.51 (m, 8H), 2.28 (s, 3H); <sup>13</sup>C NMR (125 MHz, DMSO-d6) δ 171.9, 162.3, 162.2, 144.3, 66.9, 22.9, 14.20. HRMS (ESI) calcd. for C<sub>9</sub>H<sub>14</sub>N<sub>3</sub>O<sub>2</sub> [M+H]<sup>+</sup> = 196.1081, found 196.1083.

**Ethyl 2-amino-4-phenyl-1H-imidazole-5-carboxylate (3n):**

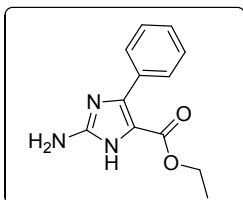

Yellow oil. Yield: 169 mg (73%); <sup>1</sup>H NMR (500 MHz, DMSO-d6) δ 10.86(s, 1H), 7.86 (d, *J* = 7.4 Hz, 2H), 7.32-7.24 (m, 3H), 5.73 (s, 2H), 4.13 (q, *J* = 7.1 Hz, 2H), 1.19 (t, *J* = 7.1 Hz, 3H); <sup>13</sup>C NMR (125 MHz, DMSO-d6) δ 164.8, 156.6, 139.0, 137.0, 133.9, 132.8, 132.6, 64.5, 19.5. HRMS (ESI) calcd. for C<sub>12</sub>H<sub>14</sub>N<sub>3</sub>O<sub>2</sub>[M+H]<sup>+</sup> = 232.1081, found 232.1082.

**Ethyl 2-(2-ethoxy-2-oxoethyl)-4-phenyl-1H-imidazole-5-carboxylate (3o):**

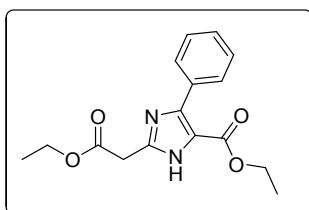

Yellow solid, m.p.116.3-116.7 °C. Yield: 193 mg (64%); <sup>1</sup>H NMR (500 MHz, CDCl<sub>3</sub>) δ 9.22 (s, 1H), 7.24-7.16 (m, 5H), 5.14 (s, 2H), 4.26 (q, *J* = 7.1 Hz, 2H), 4.16 (t, *J* = 7.1 Hz, 2H), 1.26 (t, *J* = 7.1 Hz, 6H). <sup>13</sup>C NMR (125 MHz, CDCl<sub>3</sub>) δ 168.5, 165.6, 147.1, 131.2, 128.8, 127.3, 126.3, 125.1, 111.6, 93.3, 61.6, 59.7, 14.6, 14.2. HRMS (ESI) calcd. for C<sub>16</sub>H<sub>19</sub>N<sub>2</sub>O<sub>4</sub> [M+H]<sup>+</sup> = 303.1339, found 303.1339.

**Ethyl 2-(2-fluorobenzyl)-4-phenyl-1H-imidazole-5-carboxylate (3p):**

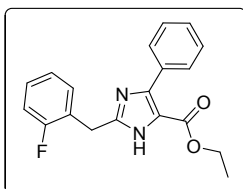

Yellow oil; Yield: 185 mg (57%); <sup>1</sup>H NMR (500 MHz, CDCl<sub>3</sub>) δ 7.79 (s, 2H), 7.40-7.33 (m, 3H), 7.26 (s, 2H), 7.12-7.04 (m, 2H), 4.27 (q, *J* = 7.1 Hz, 2H), 4.15 (s, 2H), 1.27 (t, *J* = 7.2 Hz, 3H); <sup>13</sup>C NMR (75 MHz, CDCl<sub>3</sub>) δ 159.6(d, *J* = 245.1 Hz), 159.4, 146.8, 131.1, 130.2, 130.0 (d, *J* = 3.8 Hz), 128.3, 128.2, 126.8, 123.7, 123.6, 122.1 (d, *J* = 15.6 Hz), 120.7, 114.5 (d, *J* = 21.6 Hz), 60.1, 27.2 (d, *J* = 3.3 Hz), 13.1. HRMS (ESI) calcd. for C<sub>19</sub>H<sub>18</sub>FN<sub>2</sub>O<sub>2</sub> [M+H]<sup>+</sup> = 325.1347, found 325.1348.

**Ethyl 2-(2-ethoxy-2-oxoethyl)-4-(p-tolyl)-1H-imidazole-5-carboxylate (3q):**

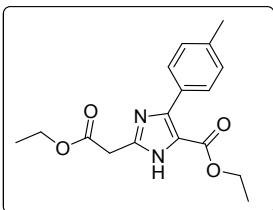

Yellow oil. Yield: 250 mg (79%);  $^1\text{H}$  NMR (500 MHz,  $\text{CDCl}_3$ )  $\delta$  9.07 (s, 1H), 7.16 (d,  $J = 8.1$  Hz, 2H), 7.03 (d,  $J = 8.0$  Hz, 2H), 5.15 (s, 2H), 4.28 (d,  $J = 7.2$  Hz, 2H), 4.19 (d,  $J = 7.1$  Hz, 2H), 2.31 (s, 3H), 1.32-1.26 (m, 6H).  $^{13}\text{C}$  NMR (125 MHz,  $\text{CDCl}_3$ )  $\delta$  168.4, 165.6, 146.8, 137.3, 129.5, 128.4, 126.3, 125.3, 111.2, 93.1, 61.5, 59.6, 21.3, 14.6, 14.2. HRMS (ESI) calcd. for  $\text{C}_{17}\text{H}_{21}\text{N}_2\text{O}_4$   $[\text{M}+\text{H}]^+ = 317.1496$ , found 317.1498.

**Ethyl 2-amino-4-(4-methoxyphenyl)-1H-imidazole-5-carboxylate (3r):**

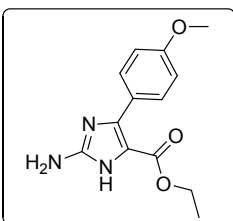

Yellow oil. Yield: 178 mg (68%);  $^1\text{H}$  NMR (500 MHz,  $\text{DMSO-d}_6$ )  $\delta$  10.68 (s, 1H), 7.86 (d,  $J = 8.6$  Hz, 2H), 6.86 (d,  $J = 9.0$  Hz, 2H), 5.68 (s, 2H), 4.12 (q,  $J = 7.1$  Hz, 2H), 3.73 (s, 3H), 1.20 (t,  $J = 7.1$  Hz, 3H);  $^{13}\text{C}$  NMR (125 MHz,  $\text{DMSO-d}_6$ )  $\delta$  160.2, 159.3, 151.8, 130.4, 113.3, 59.6, 55.5, 14.8. HRMS (ESI) calcd. for  $\text{C}_{13}\text{H}_{16}\text{N}_3\text{O}_3$   $[\text{M}+\text{H}]^+ = 262.1186$ , found 262.1188.

**Ethyl 2-(2-fluorobenzyl)-4-(4-methoxyphenyl)-1H-imidazole-5-carboxylate (3s):**

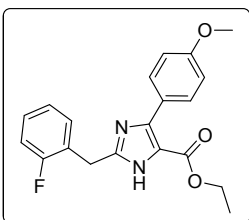

Yellow oil; Yield: 163 mg (46%);  $^1\text{H}$  NMR (500 MHz,  $\text{CDCl}_3$ )  $\delta$  9.58 (s, 1H), 7.87 (s, 1H), 7.31-7.25 (m, 2H), 7.09 (d,  $J = 6.8$  Hz, 2H), 6.92 (d,  $J = 8.8$  Hz, 2H), 4.34-4.24 (m, 2H), 4.15 (s, 2H), 3.83 (s, 3H), 1.30 (t,  $J = 7.1$  Hz, 3H);  $^{13}\text{C}$  NMR (125 MHz,  $\text{CDCl}_3$ )  $\delta$  161.7, 159.8, 159.8, 131.2, 131.2, 130.5, 129.3, 129.2, 124.7, 124.7, 115.7, 115.5, 113.3, 60.7, 55.2, 28.5, 14.2. HRMS (ESI) calcd. for  $\text{C}_{20}\text{H}_{20}\text{FN}_2\text{O}_3$   $[\text{M}+\text{H}]^+ = 355.1452$ , found 355.1452.

**Ethyl 2-amino-4-(3-bromophenyl)-1H-imidazole-5-carboxylate (3t):**

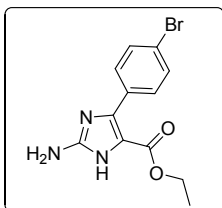

Yellow solid, m.p. 182.6-182.9 °C; Yield: 273 mg (88%); <sup>1</sup>H NMR (500 MHz, DMSO-d<sub>6</sub>) δ 10.86 (s, 1H), 7.86 (d, *J* = 7.4 Hz, 2H), 7.32-7.24 (m, 3H), 5.73 (s, 2H), 4.13 (q, *J* = 7.1 Hz, 2H), 1.19 (t, *J* = 7.1 Hz, 3H); <sup>13</sup>C NMR (125 MHz, DMSO-d<sub>6</sub>) δ 164.8, 156.6, 139.0, 137.0, 133.9, 132.8, 132.6, 64.5, 19.5; HRMS (ESI) calcd. for C<sub>12</sub>H<sub>13</sub>BrN<sub>3</sub>O<sub>2</sub>[M+H]<sup>+</sup> = 310.0186, found 310.0186.

**Ethyl 4-(3-bromophenyl)-2-(2-fluorobenzyl)-1H-imidazole-5-carboxylate (3u):**

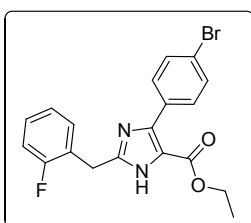

Yellow oil; Yield: 330 mg (88%); <sup>1</sup>H NMR (500 MHz, CDCl<sub>3</sub>) δ 9.89 (s, 1H), 7.93 (s, 1H), 7.93 (s, 1H), 7.40 (m, 1H), 7.39 (m, 1H), 7.20-7.16 (m, 2H), 7.06-6.99 (m, 2H), 4.22 (q, *J* = 7.1 Hz, 2H), 4.10 (s, 2H), 1.23 (t, *J* = 7.1 Hz, 3H); <sup>13</sup>C NMR (75 MHz, CDCl<sub>3</sub>) δ 159.6 (d, *J* = 245.1 Hz), 159.4, 146.8, 131.1, 130.2, 130.0 (d, *J* = 3.8 Hz), 128.3, 128.2, 126.8, 123.7, 123.6, 122.1 (d, *J* = 15.6 Hz), 120.7, 114.5 (d, *J* = 21.6 Hz), 60.1, 27.2 (d, *J* = 3.3 Hz), 13.1. HRMS (ESI) calcd. for C<sub>19</sub>H<sub>17</sub>BrFN<sub>2</sub>O<sub>2</sub> [M+H]<sup>+</sup> = 403.0452, found 403.0452.



**X-ray crystallography Data of 3g (CCDC No: 1045551):**

Single crystals of compound **3g** were measured on a Rigaku RAXIS-RAPID single-crystal diffractometer. The recrystallization solvent of **3g** was EtOH.

**Table S1** X-ray crystallography data of **3g**

|                                 |                                                                                                                            |
|---------------------------------|----------------------------------------------------------------------------------------------------------------------------|
| Formula moiety                  | C <sub>13</sub> H <sub>13</sub> BrN <sub>2</sub> O <sub>2</sub>                                                            |
| Formula sum                     | C <sub>13</sub> H <sub>13</sub> BrN <sub>2</sub> O <sub>2</sub>                                                            |
| Formula weight                  | 309.16                                                                                                                     |
| Temperature                     | 293 K                                                                                                                      |
| Crystal system                  | triclinic                                                                                                                  |
| Space group                     | P-1                                                                                                                        |
| Unit cell dimensions            | a= 9.0885(9) Å<br>b= 10.1681(9) Å<br>c= 15.4664(10) Å<br>alpha= 88.451(6) deg.<br>beta = 87.493(7) deg.<br>gamma = 66 deg. |
| Volume                          | 1307.0(2) Å <sup>3</sup>                                                                                                   |
| Z                               | 4                                                                                                                          |
| Calculated density              | 1.571 g/cm <sup>3</sup>                                                                                                    |
| Absorption coefficient          | 3.141mm <sup>-1</sup>                                                                                                      |
| F(000)                          | 624                                                                                                                        |
| Crystal size                    | 0.18 x 0.16 x 0.13 mm                                                                                                      |
| Theta range for data collection | 3.4 to 25.3 deg                                                                                                            |
| Reflections collected / unique  | 8223 / 4768 [R(int) = 0.0385]                                                                                              |
| Data / restraints / parameters  | 4768 / 0 / 329                                                                                                             |
| Goodness-of-fit on F2           | 1.023                                                                                                                      |
| Final R indices [I>2sigma(I)]   | R1 = 0.0461, wR2 = 0.0883                                                                                                  |
| R indices (all data)            | R1 = 0.0889, wR2 = 0.1089                                                                                                  |

**<sup>1</sup>H NMR (500 MHz) and <sup>13</sup>C NMR (125 MHz) Spectra of 3:**

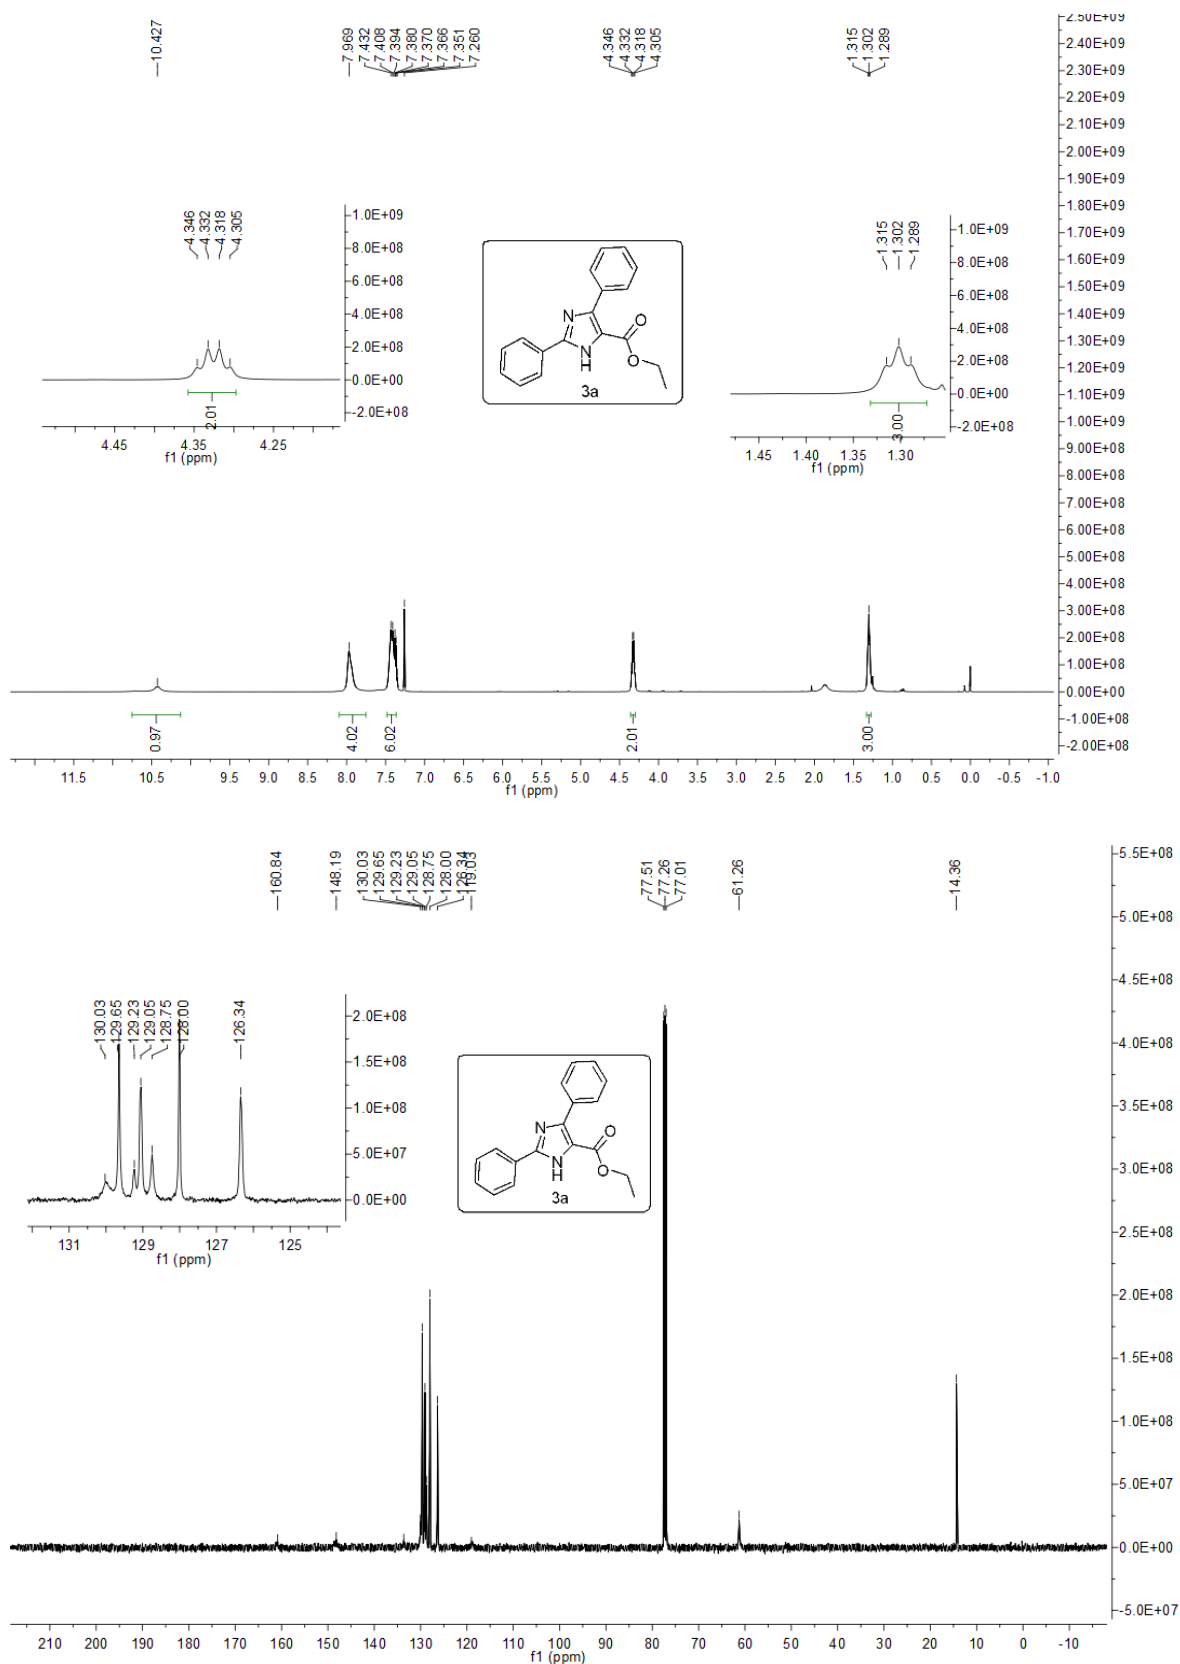

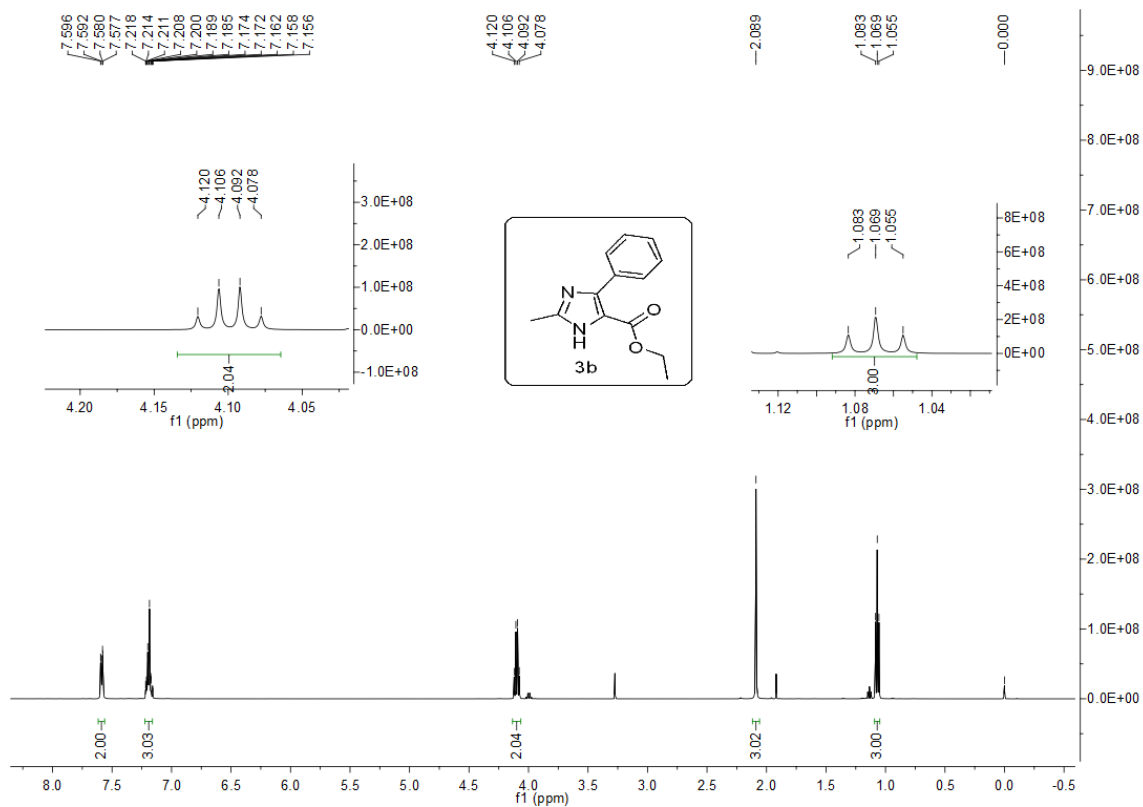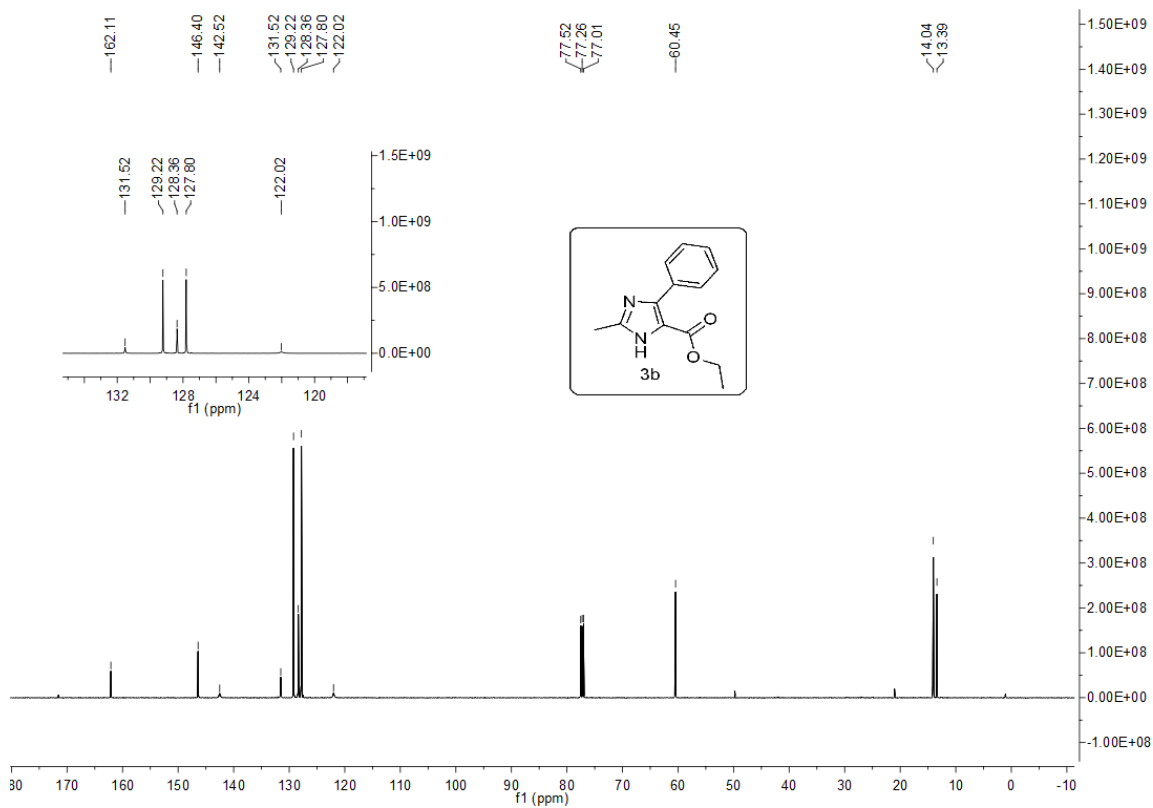

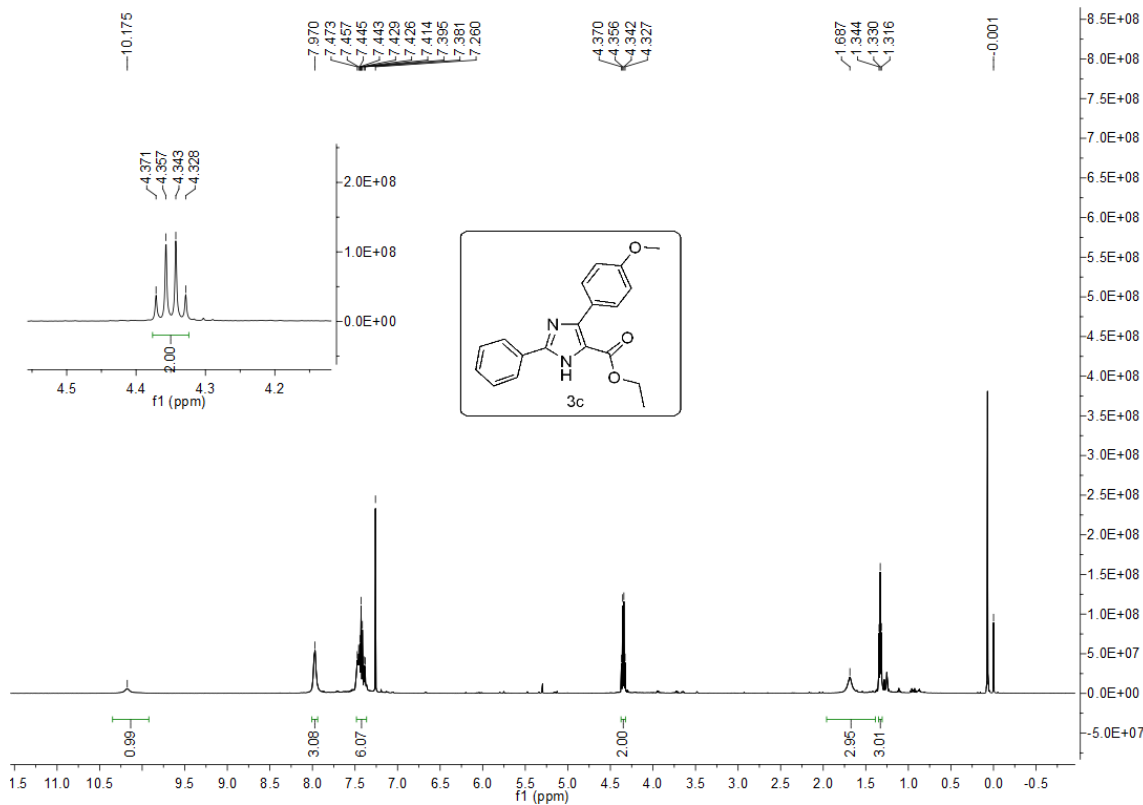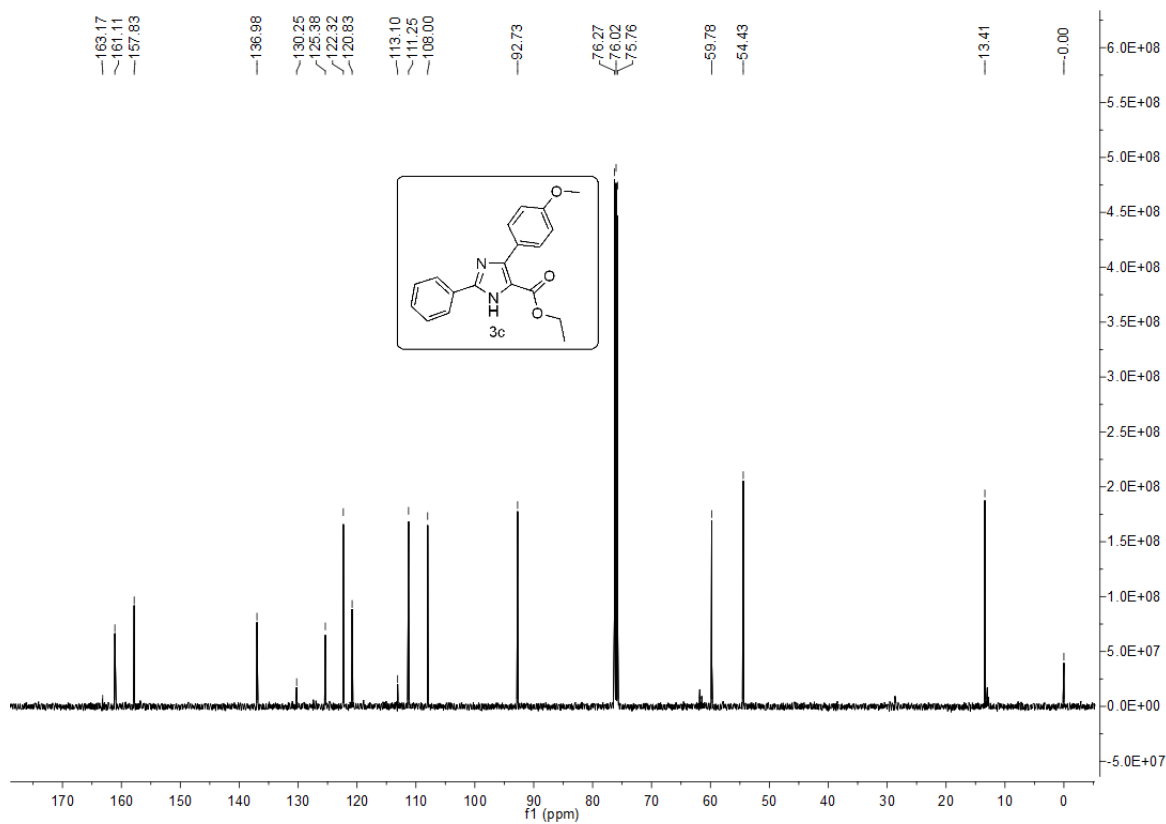

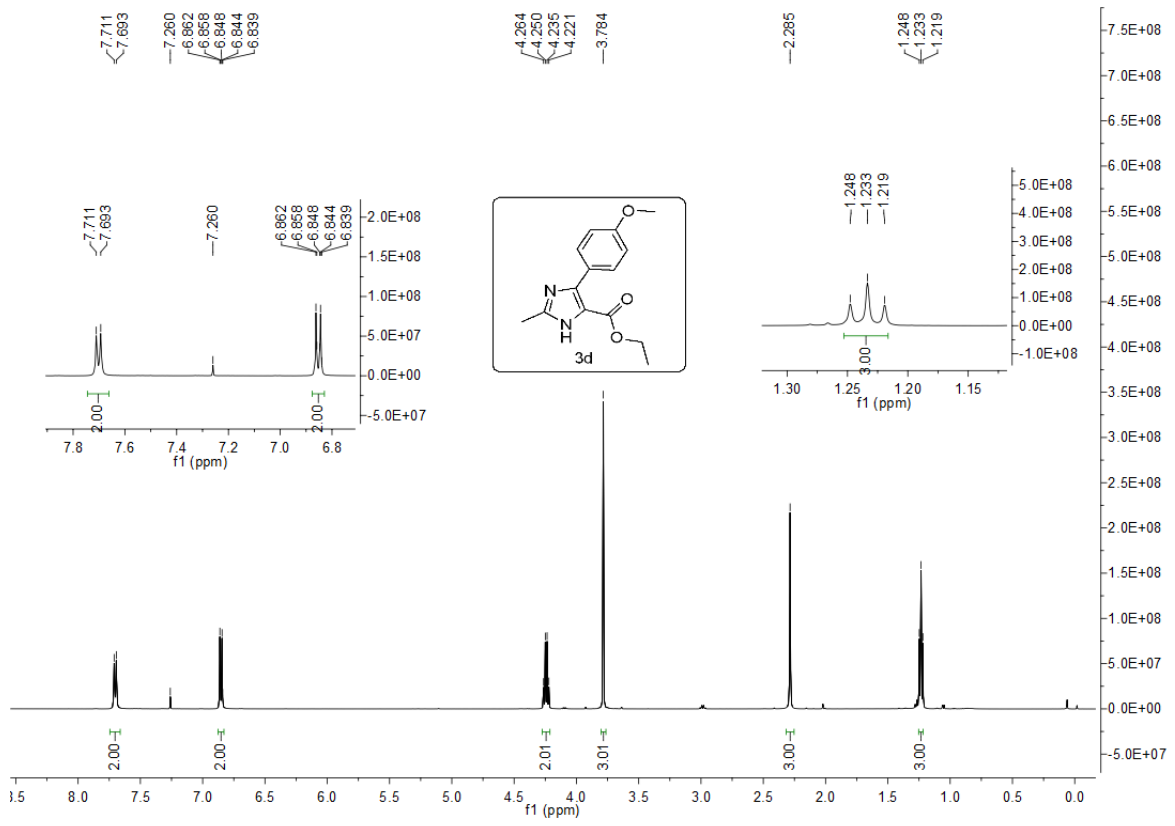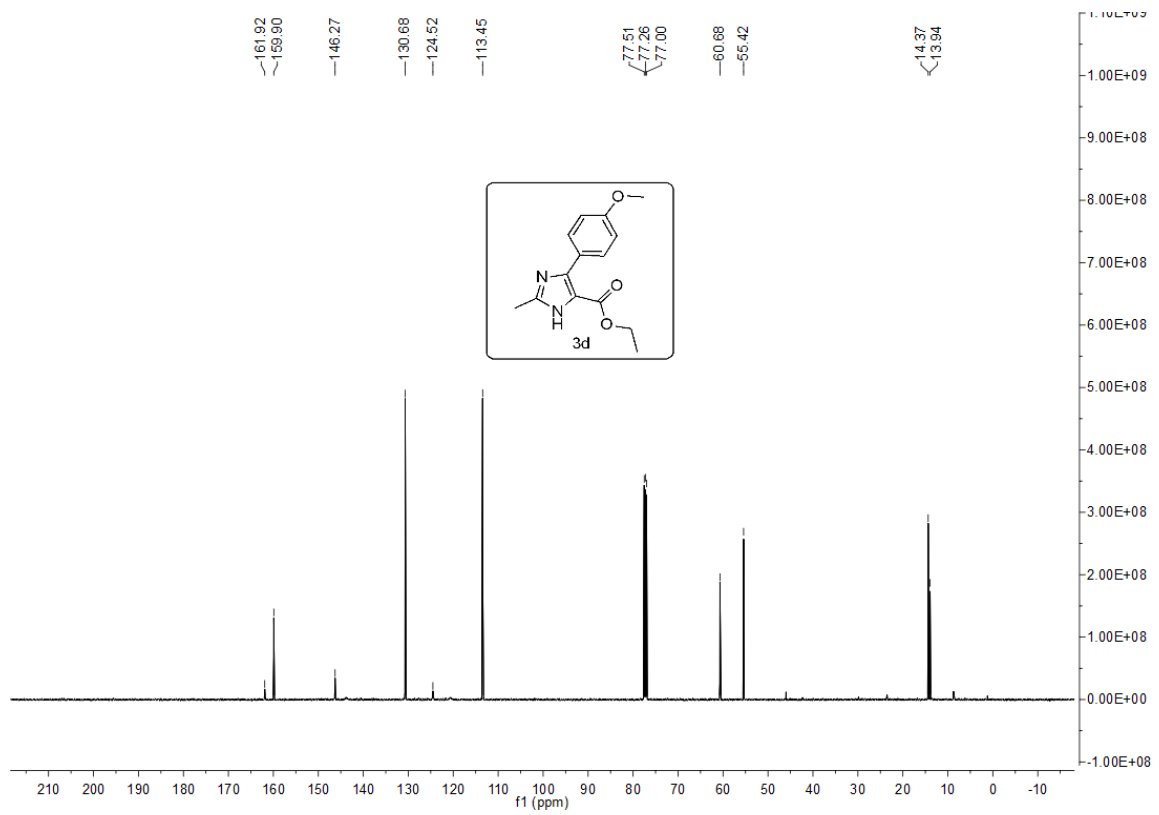

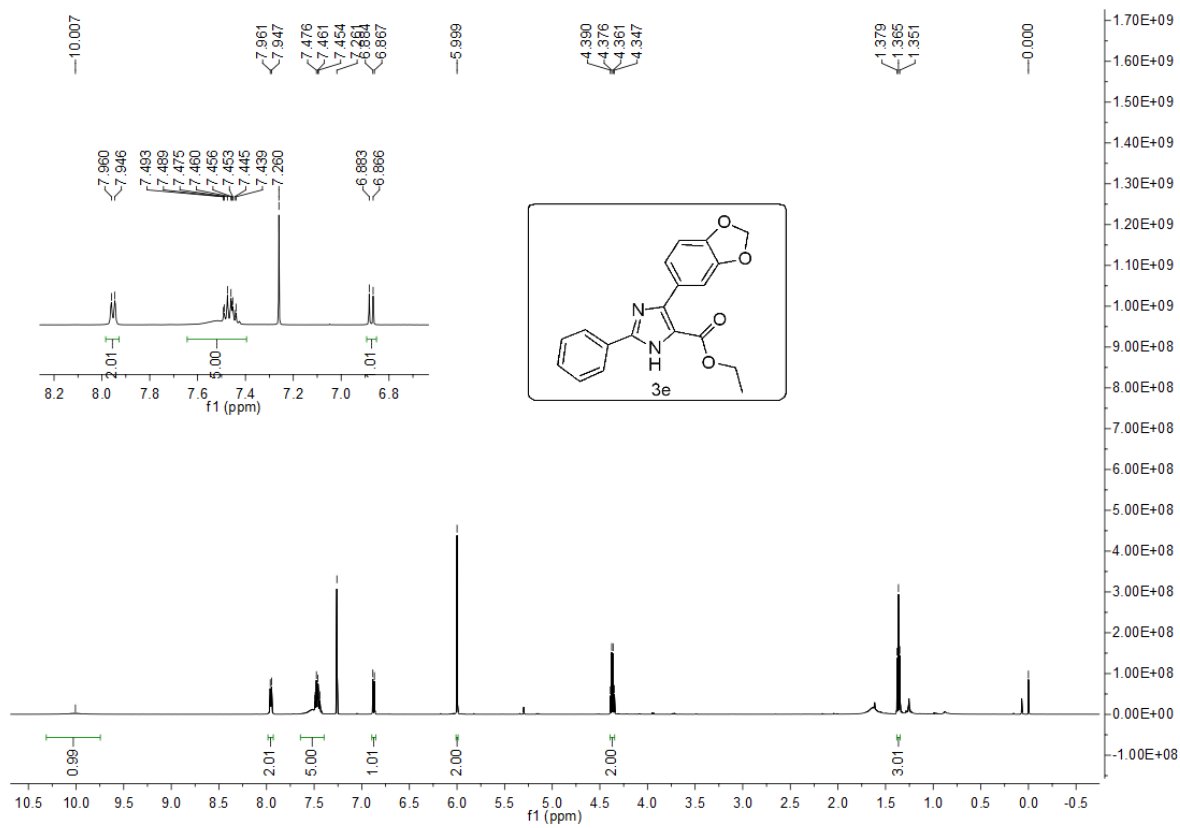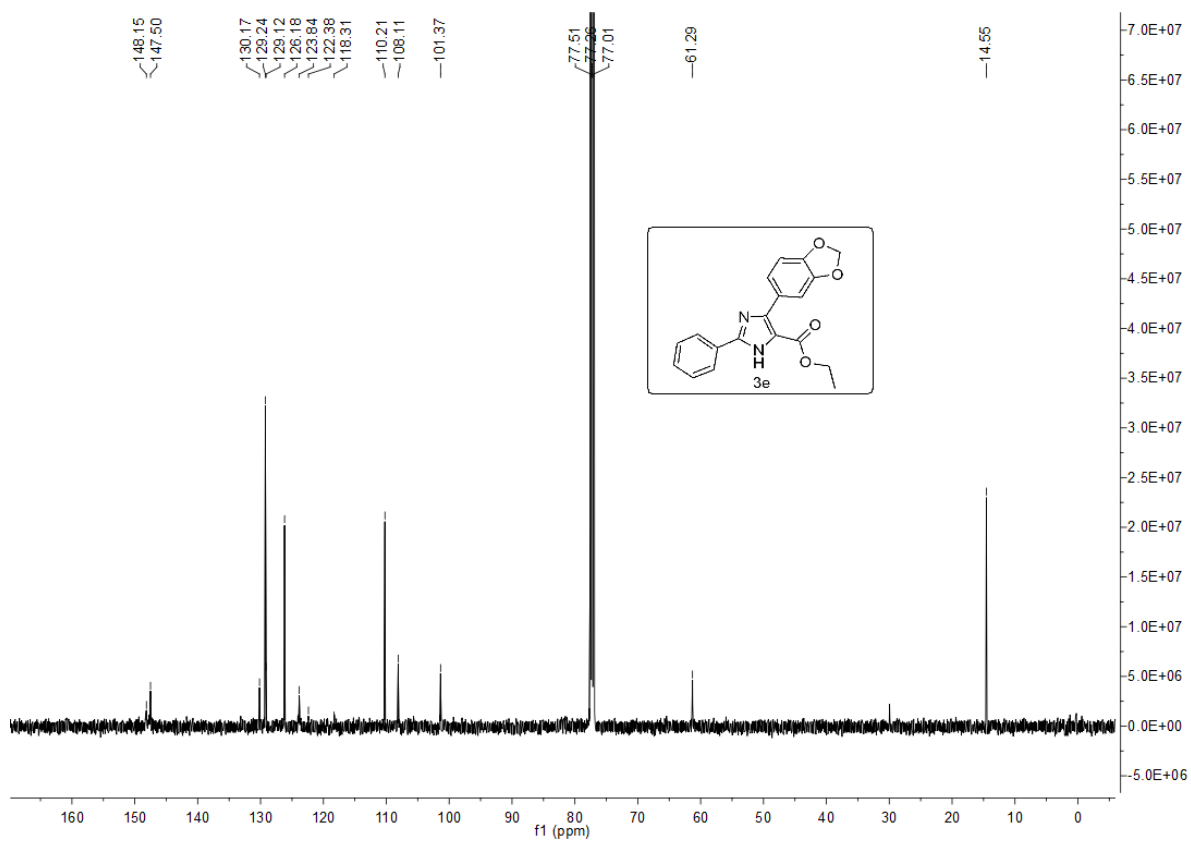

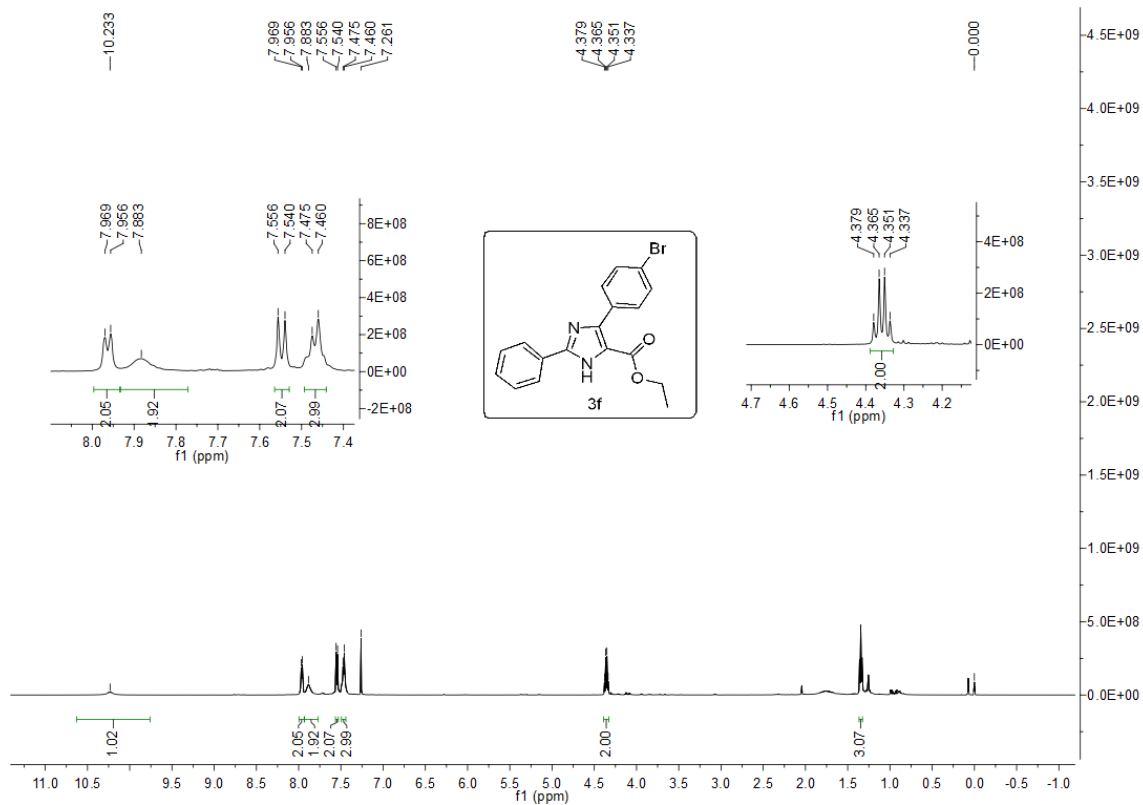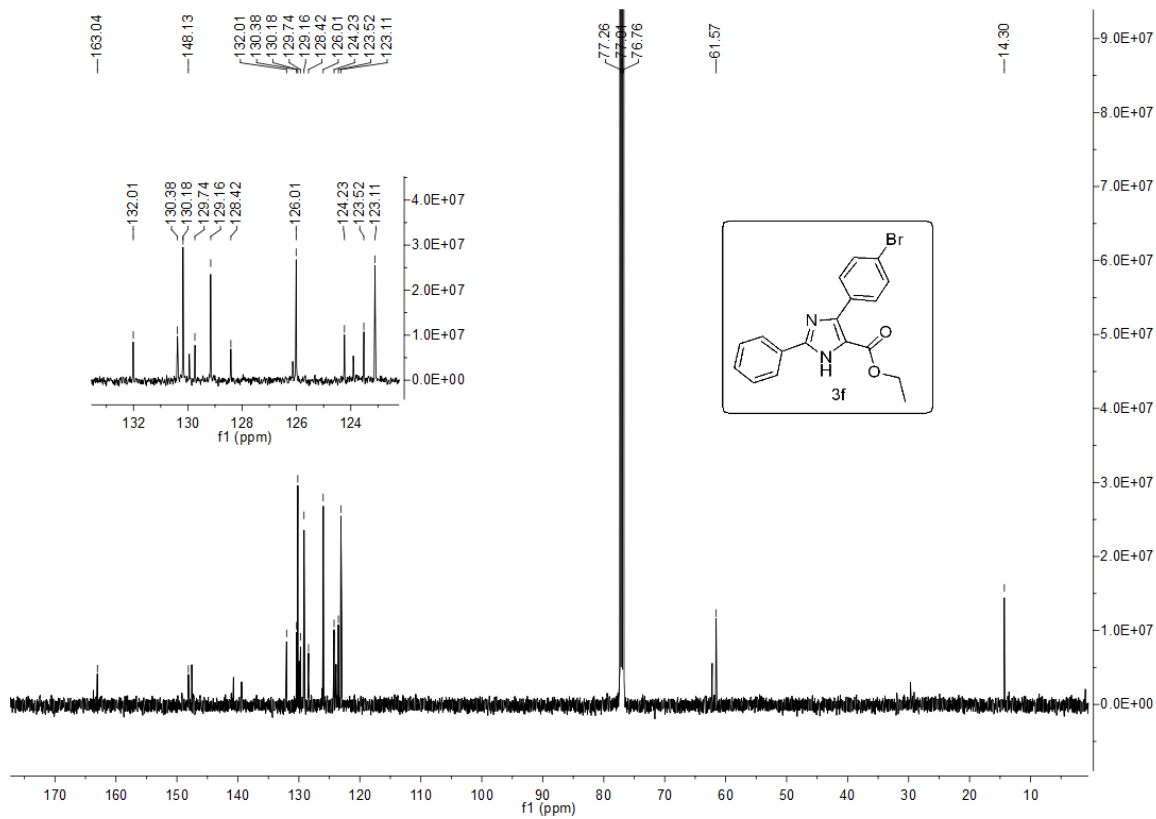

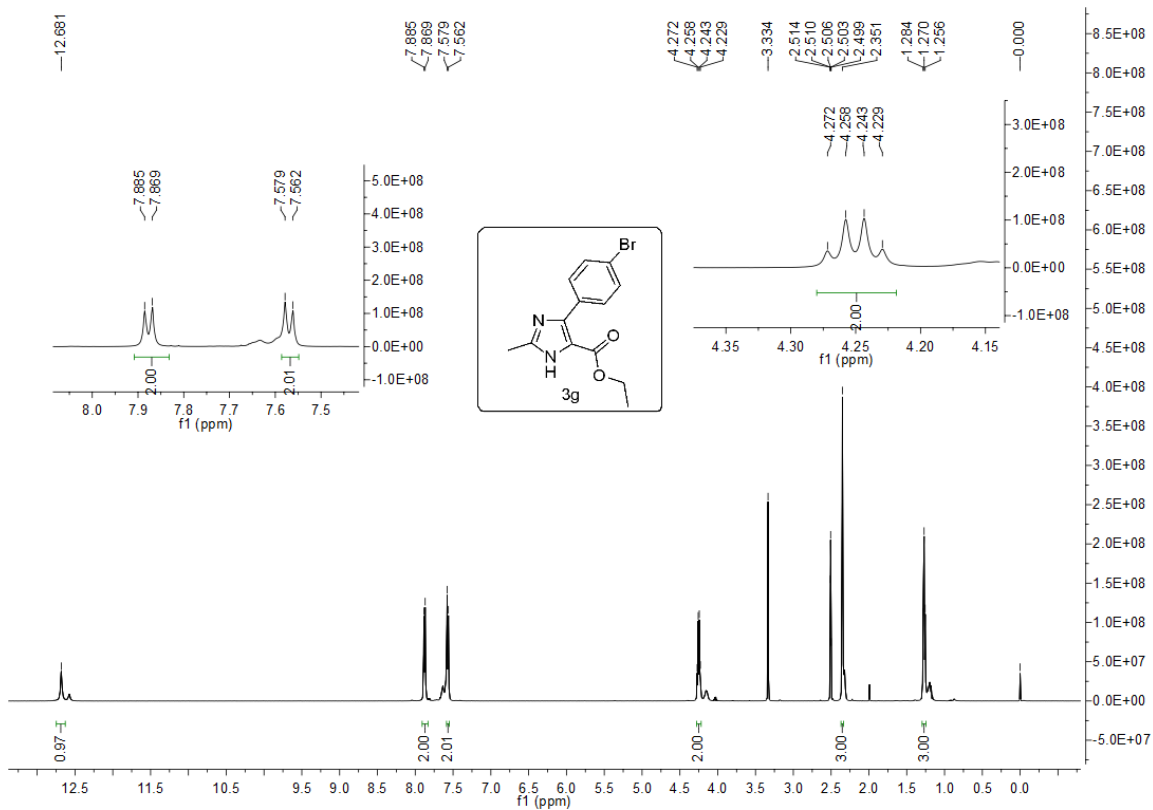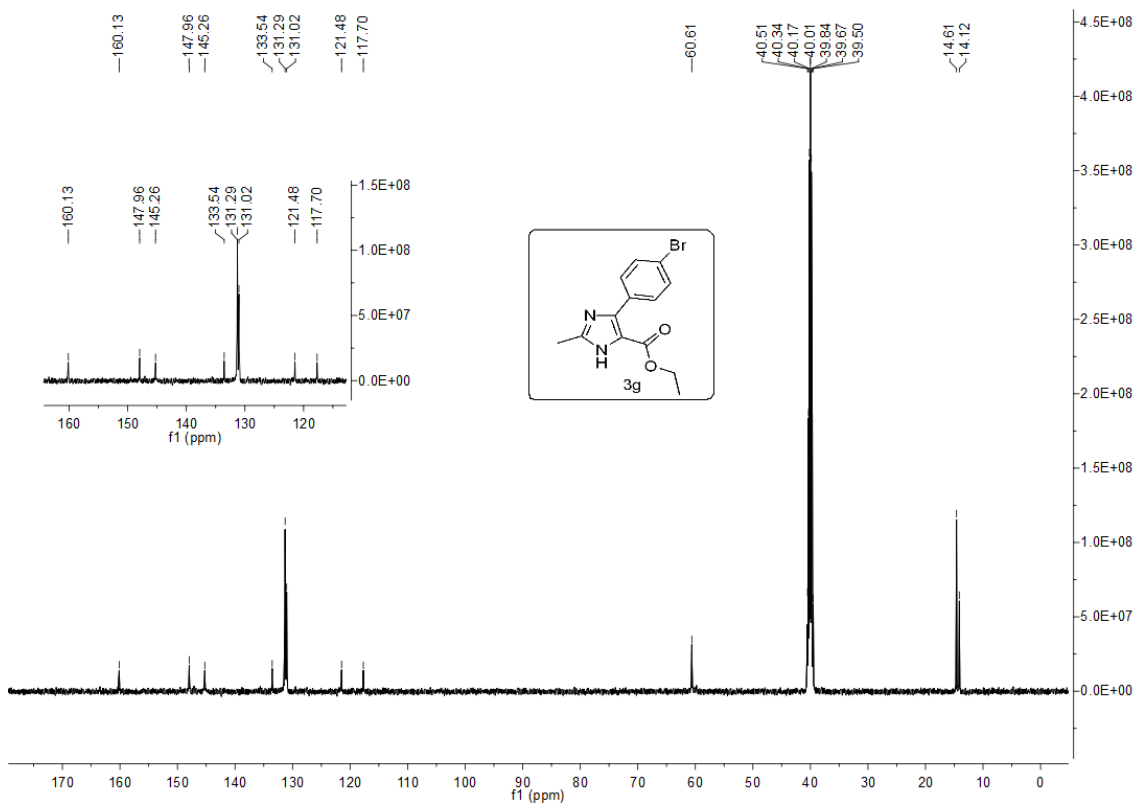



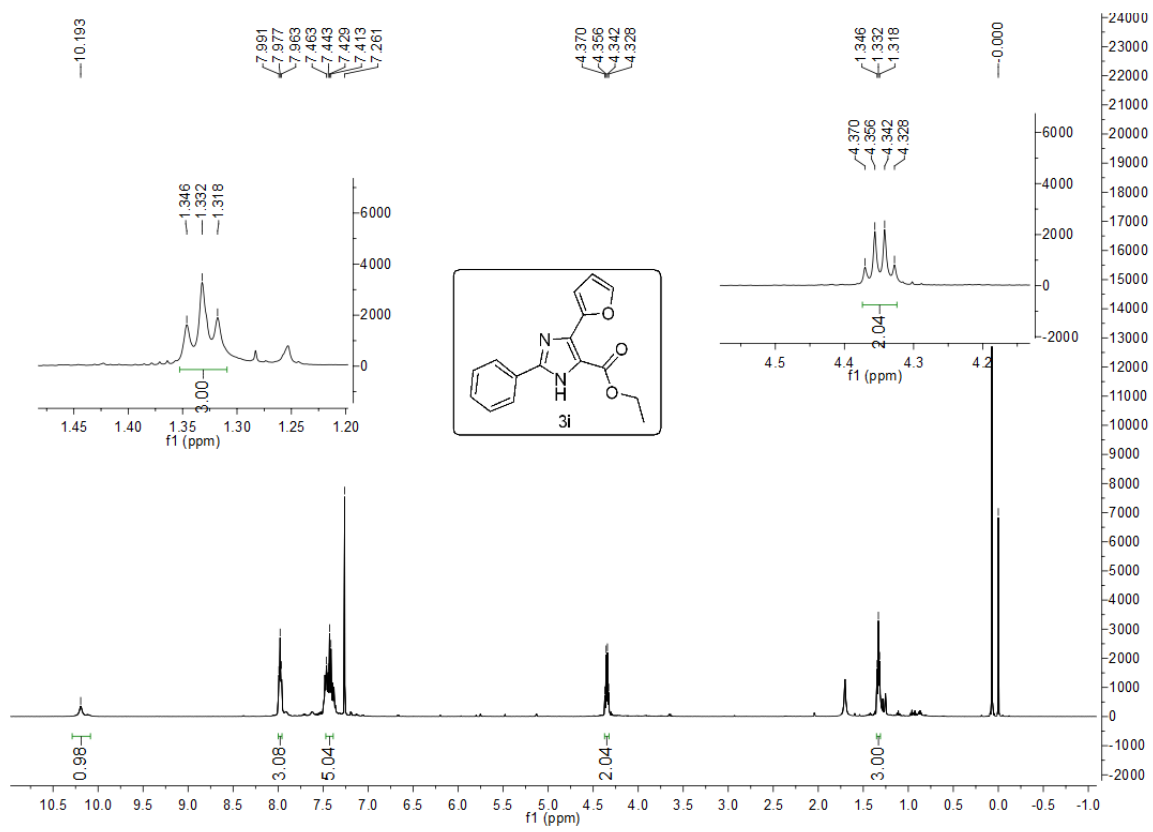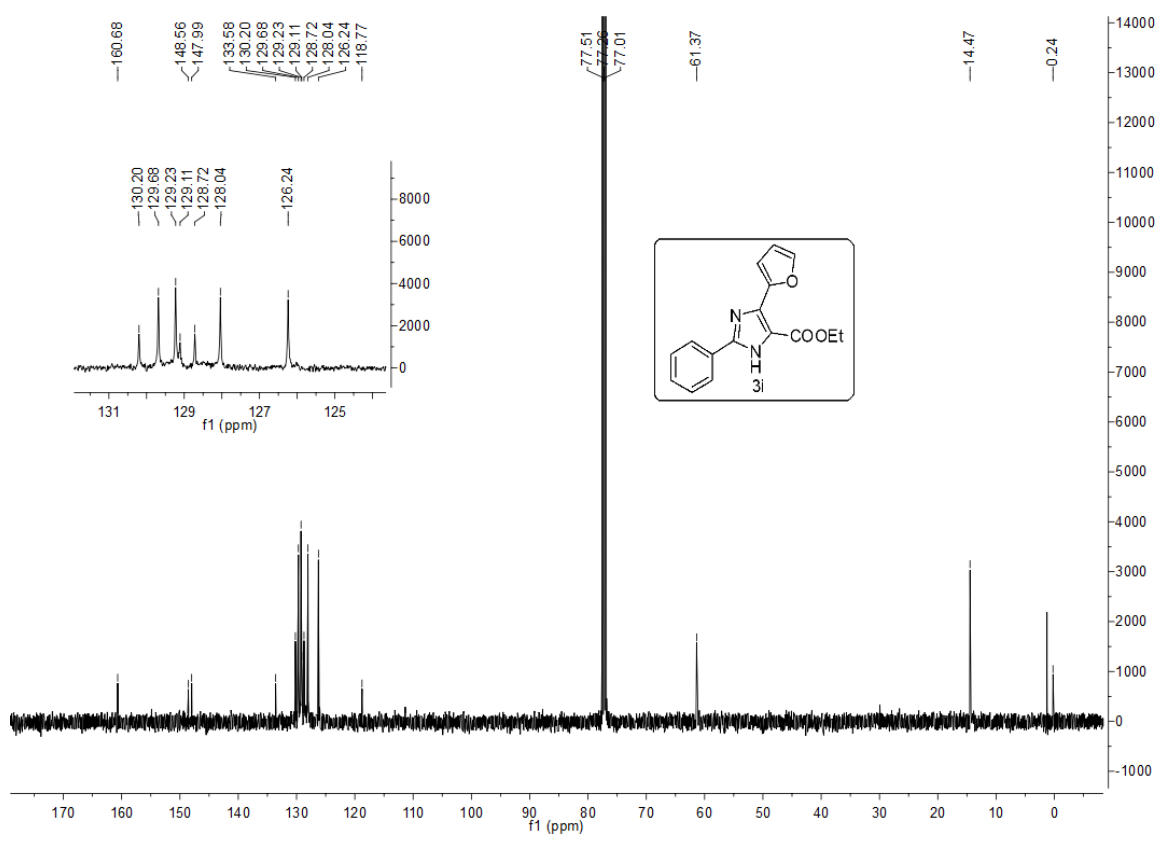

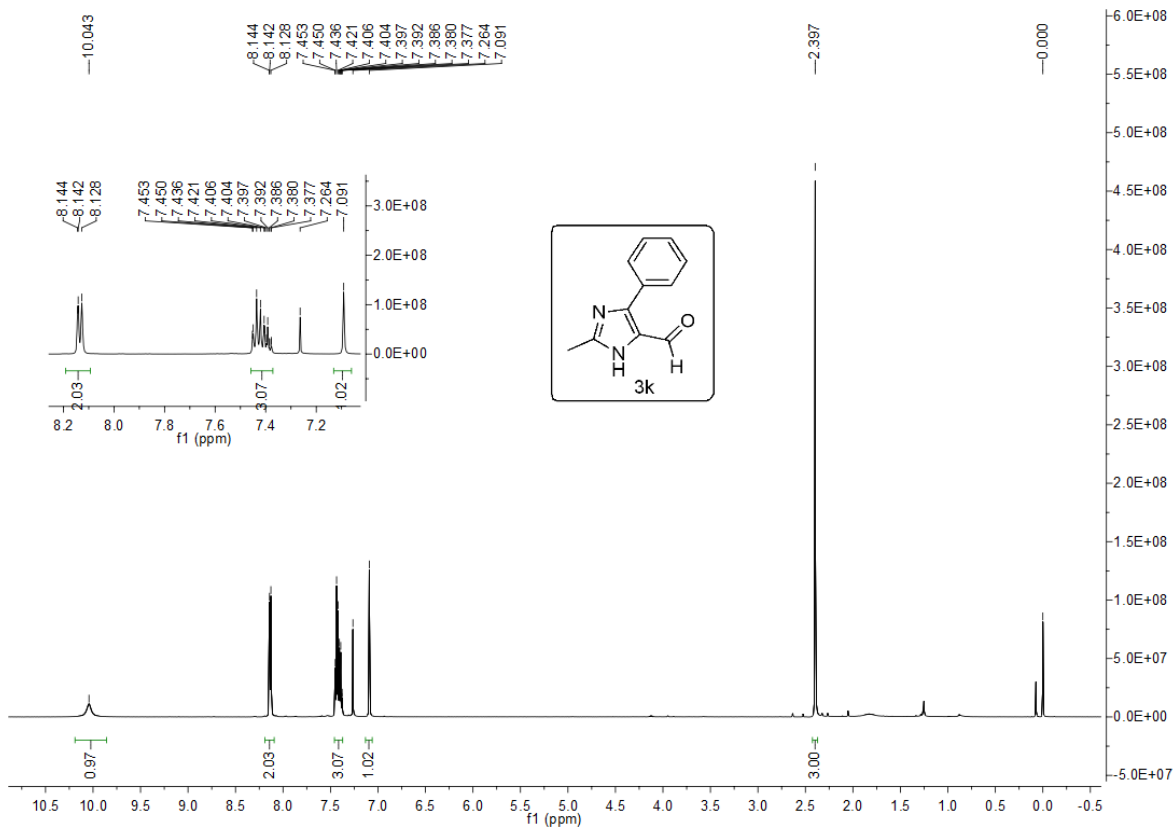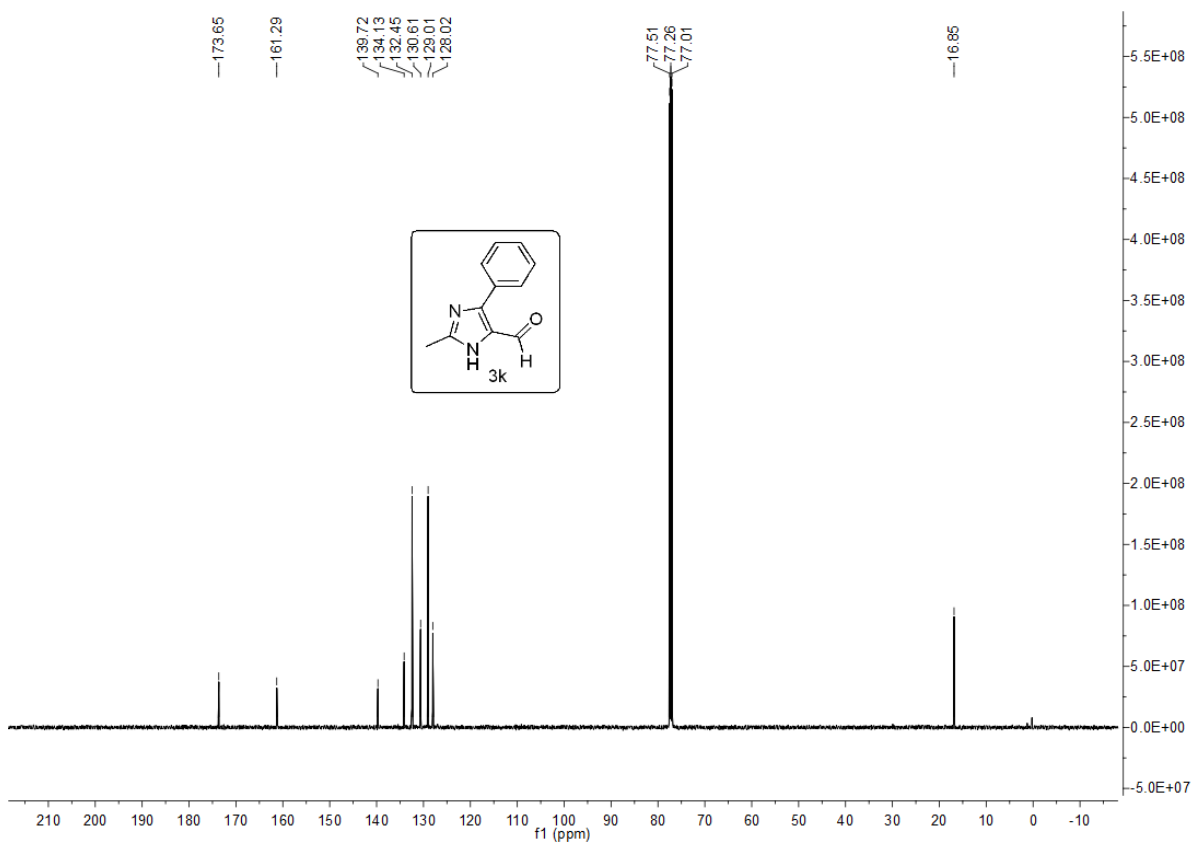

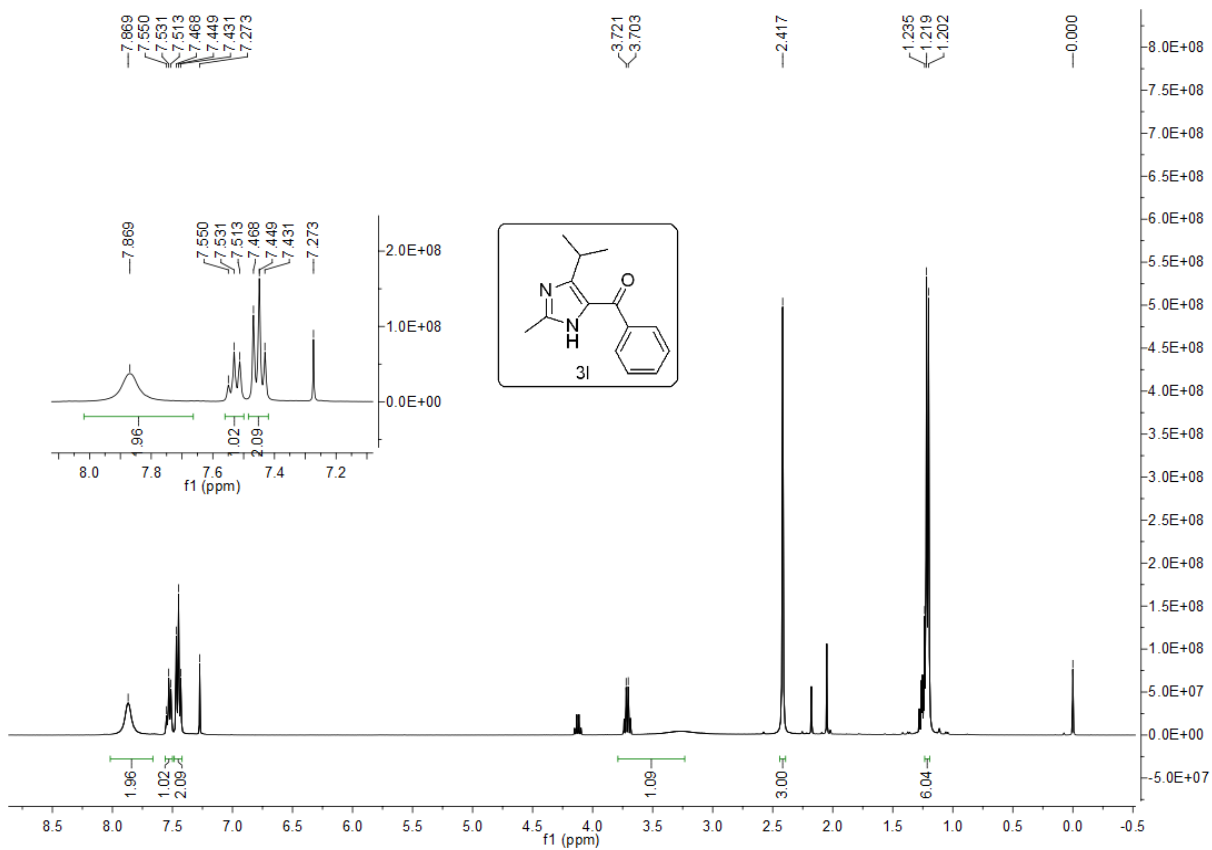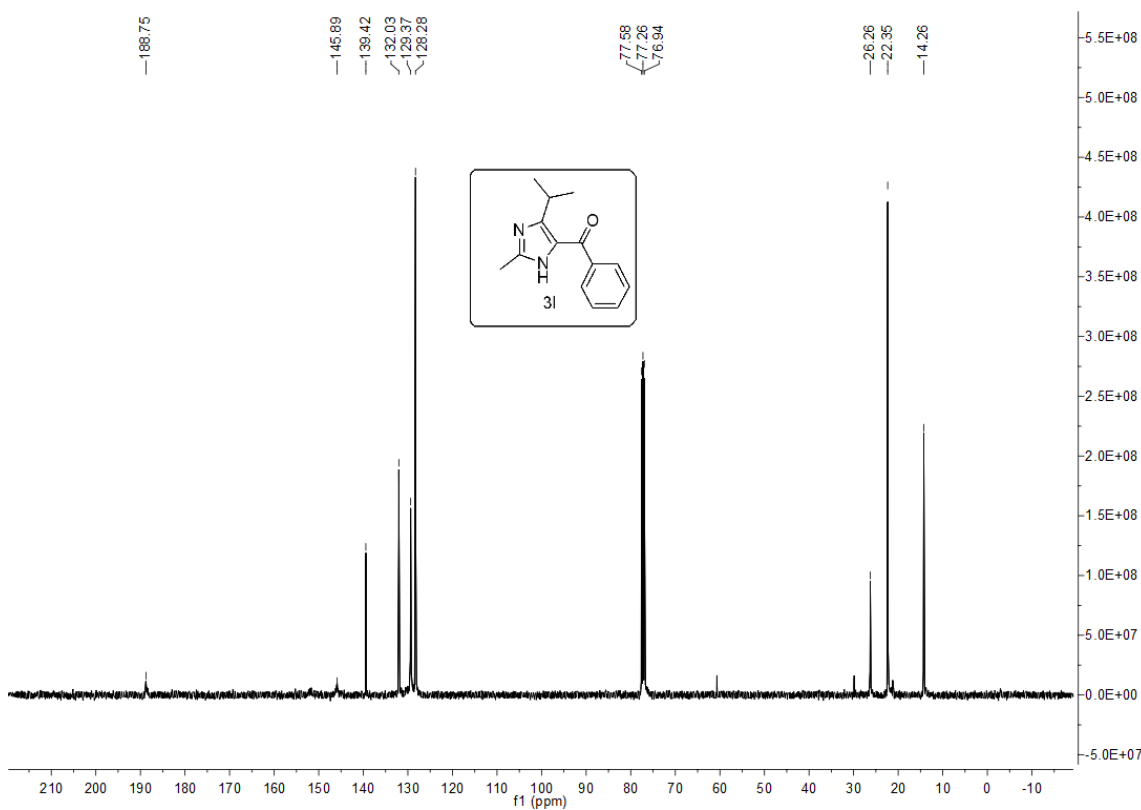

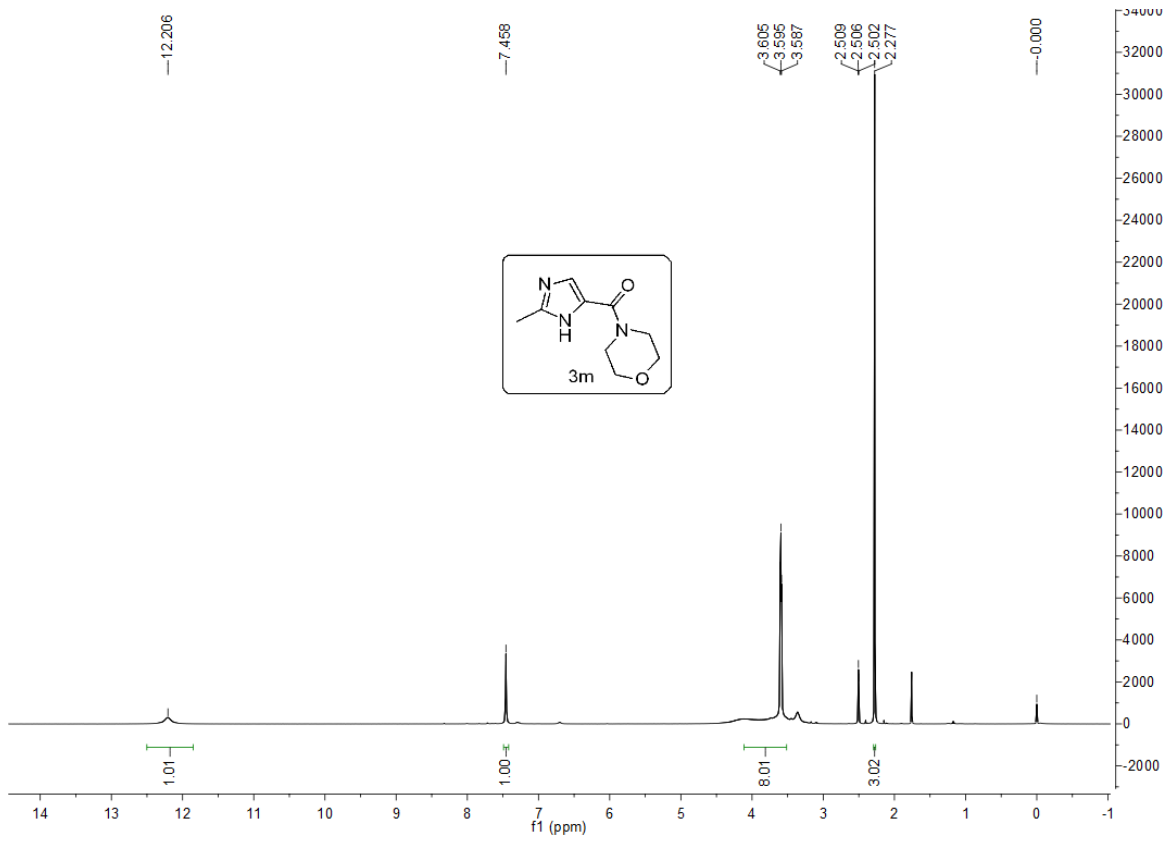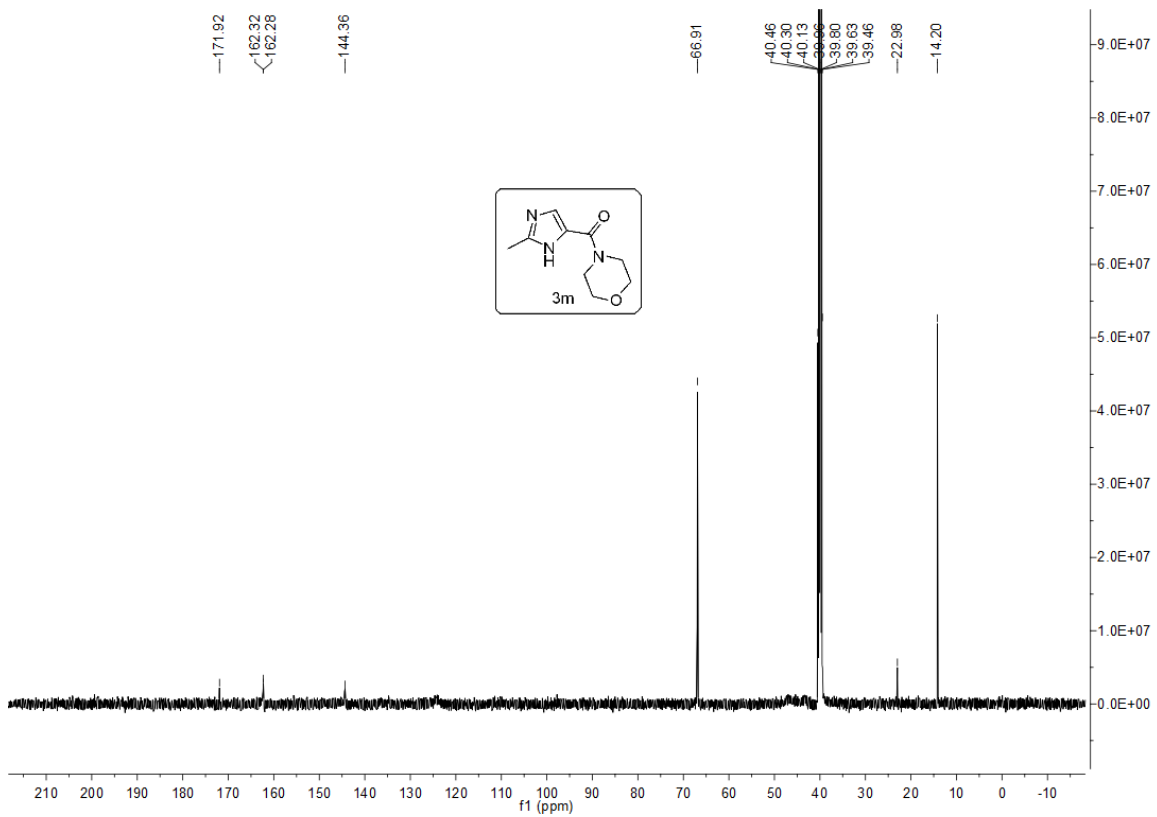

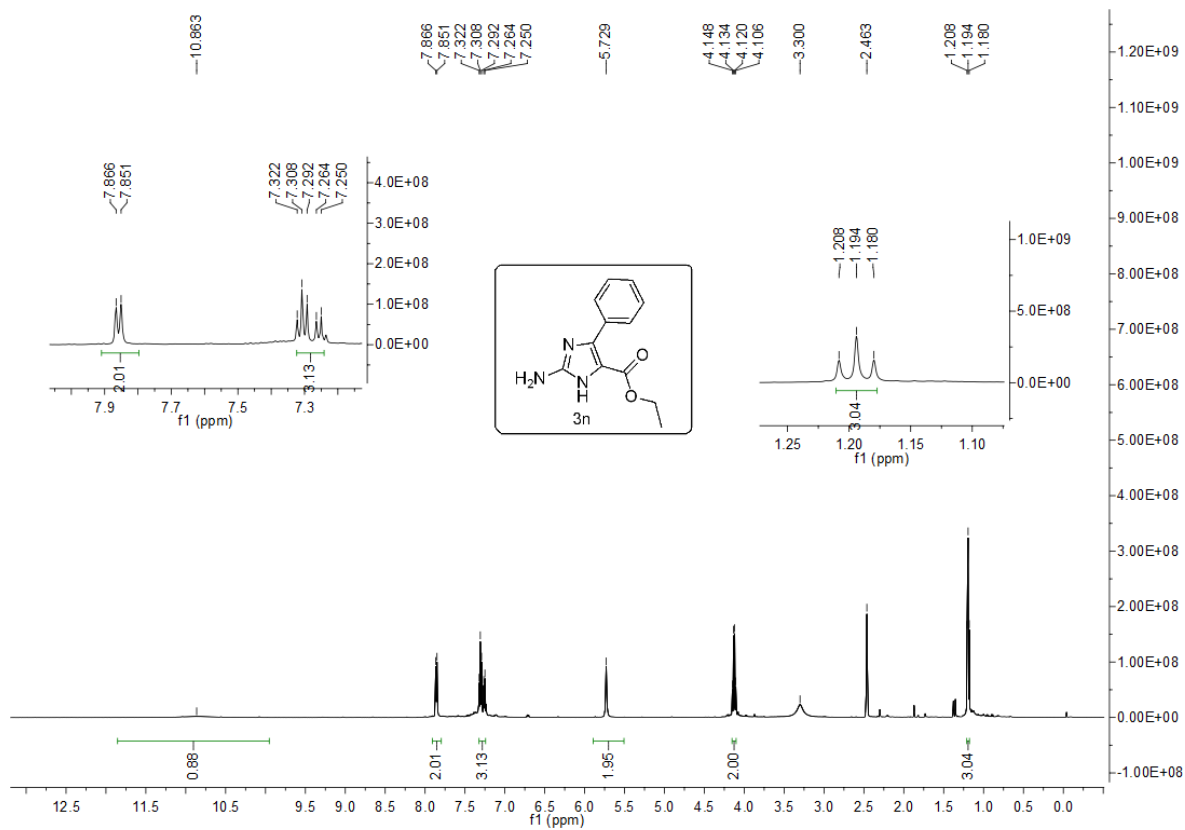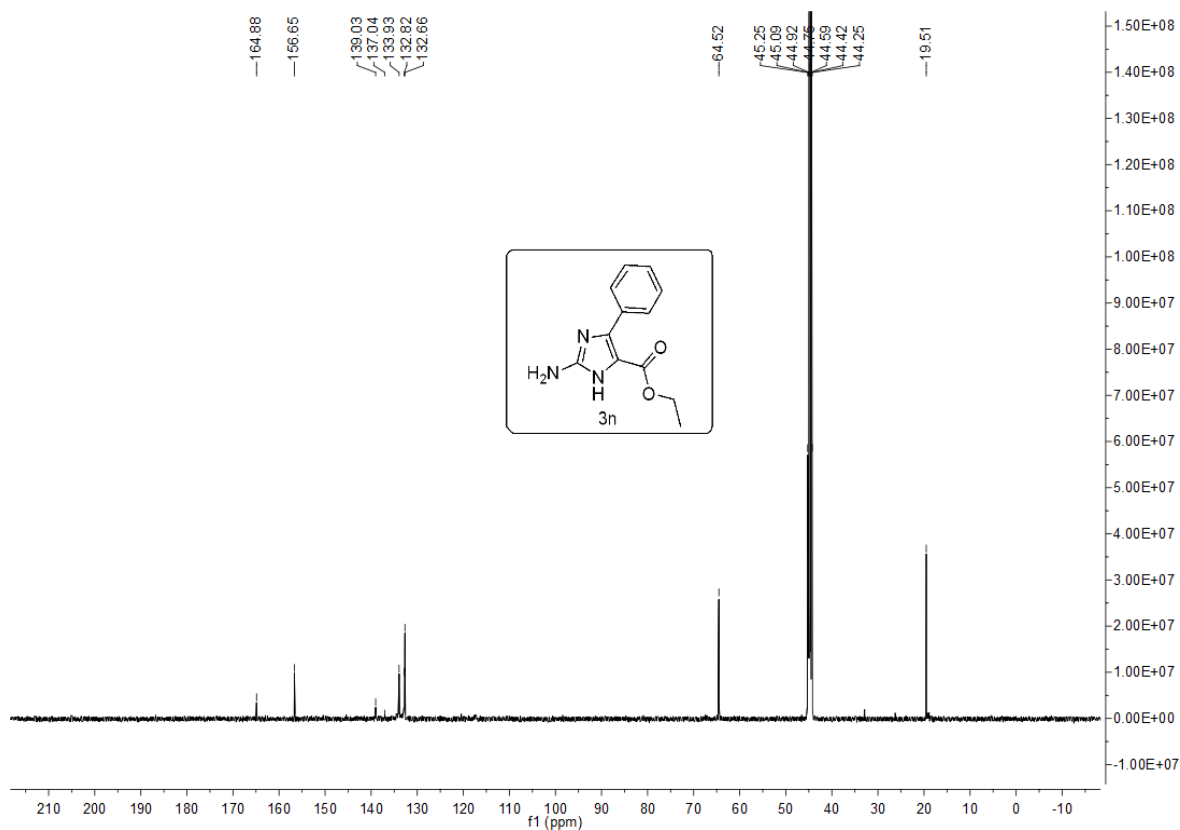

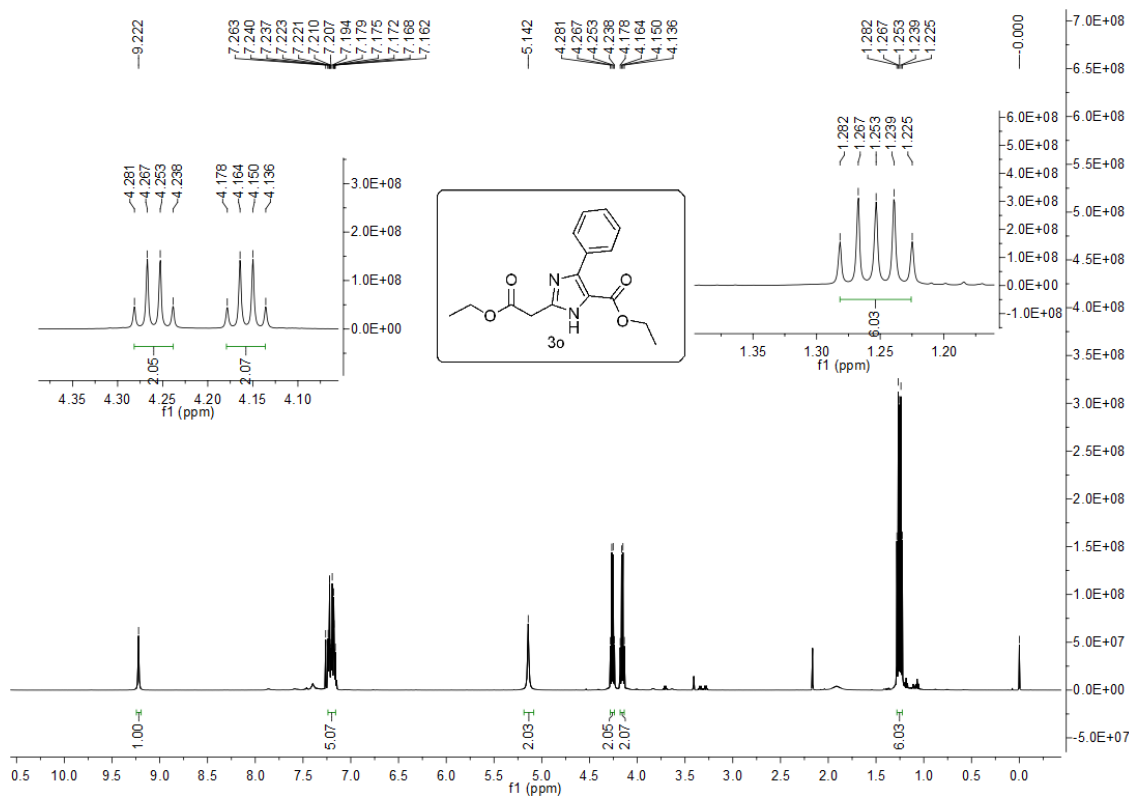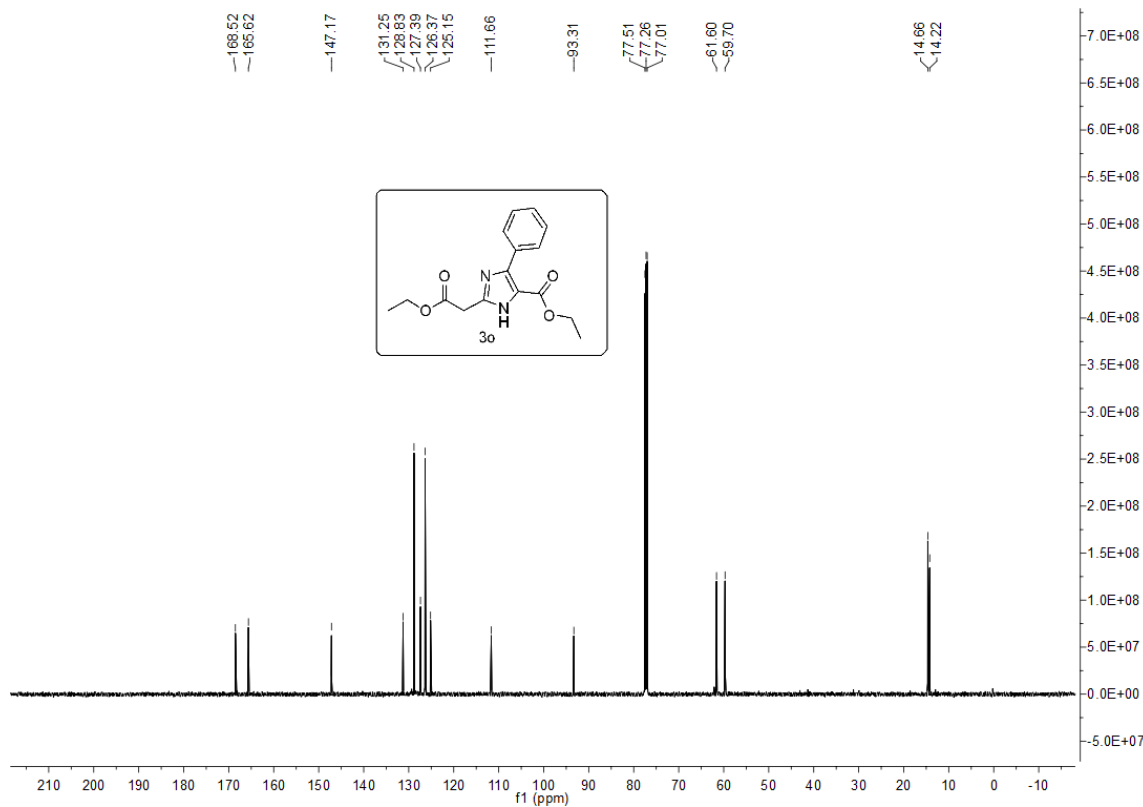

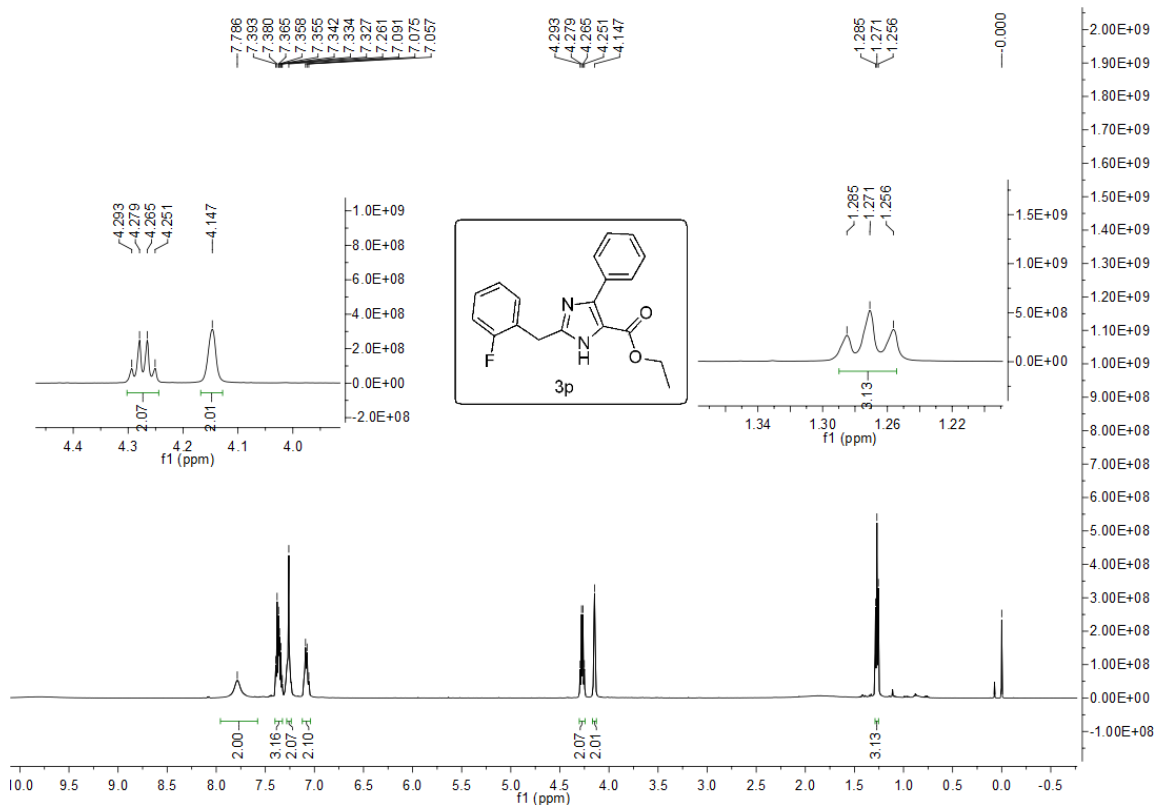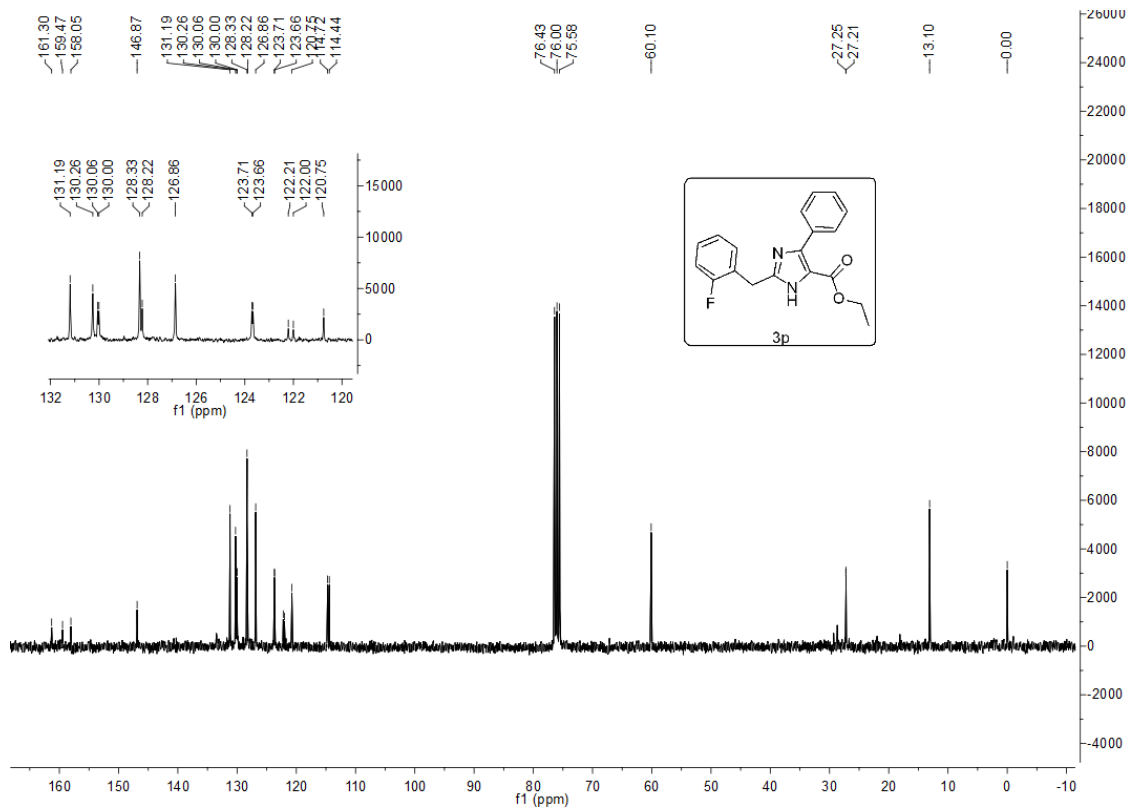

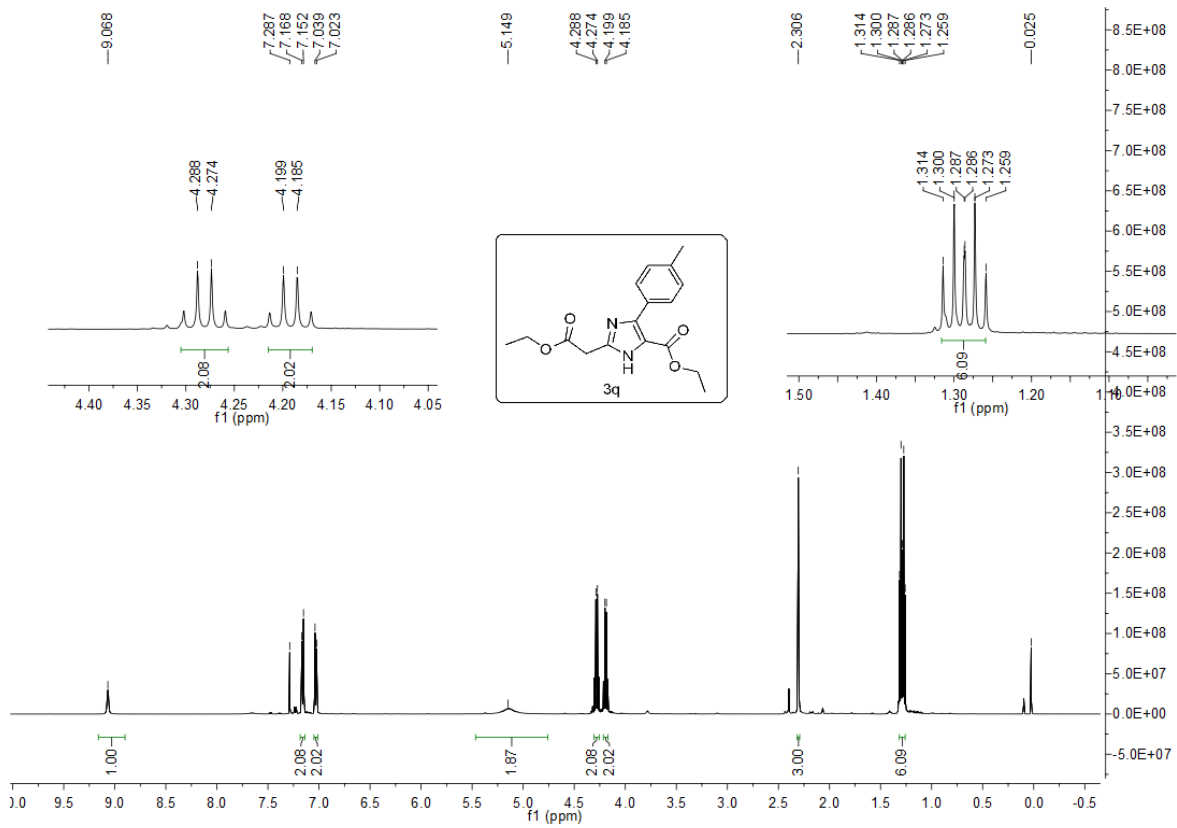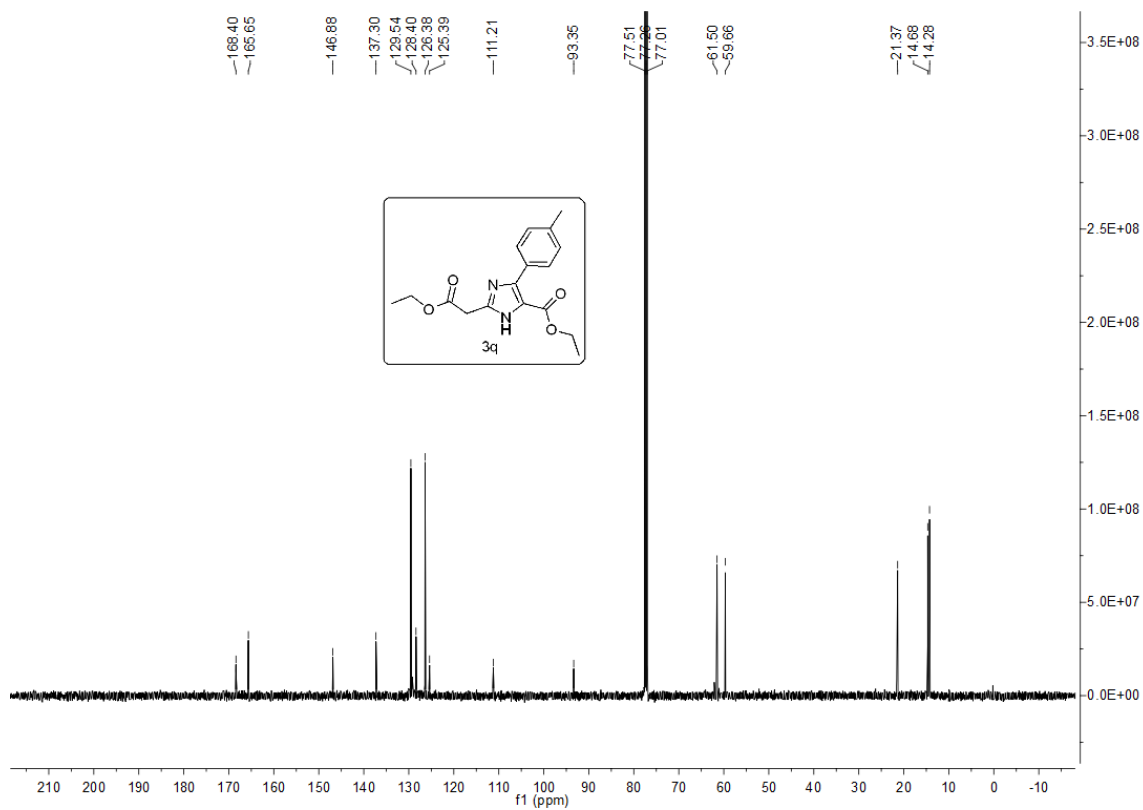



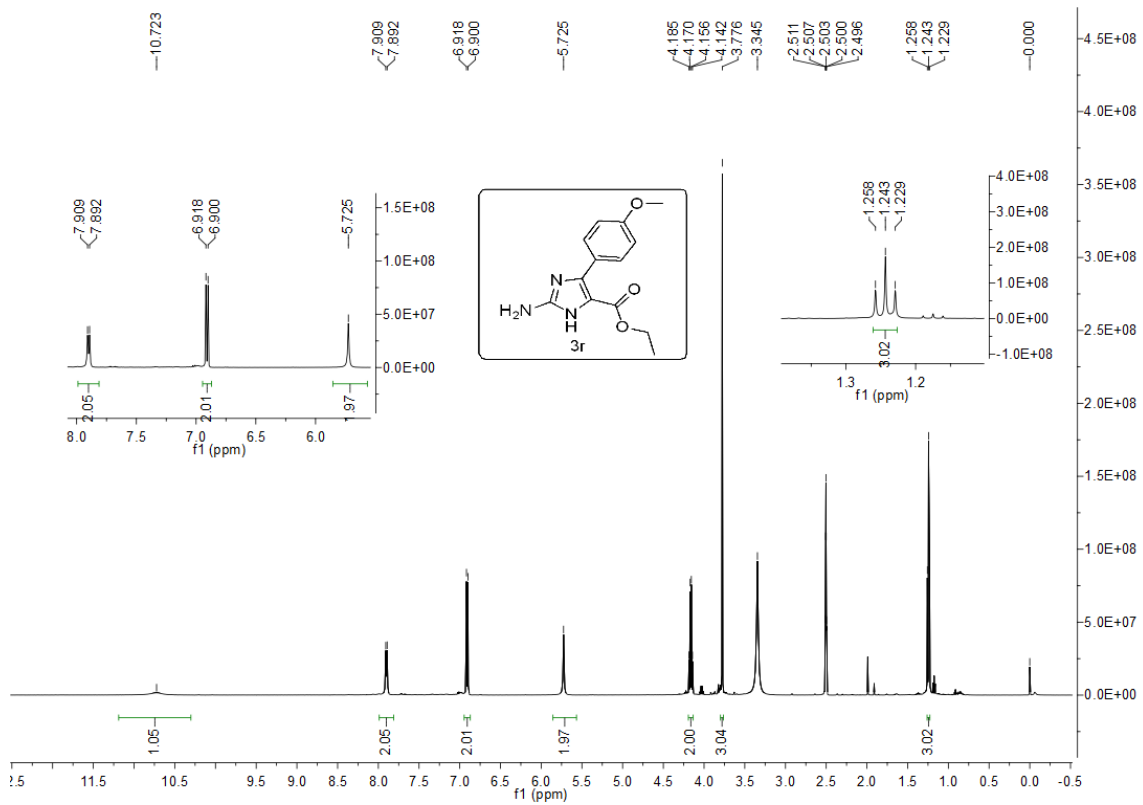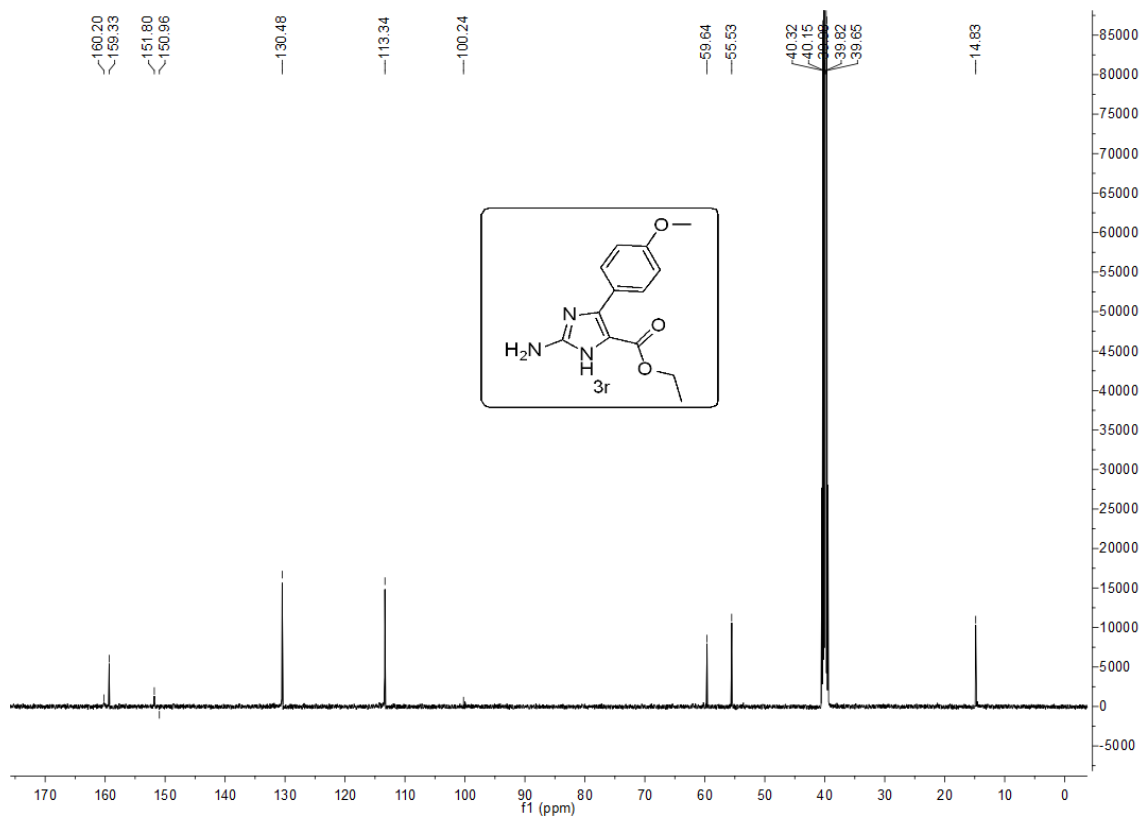

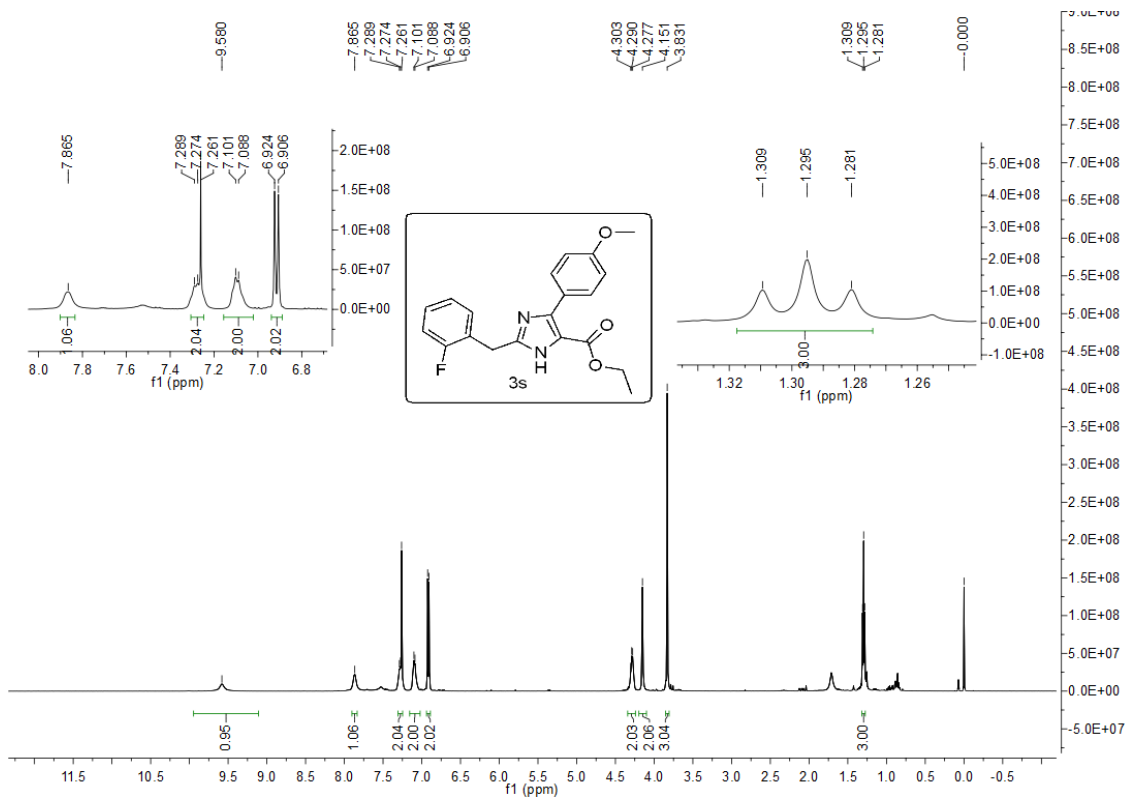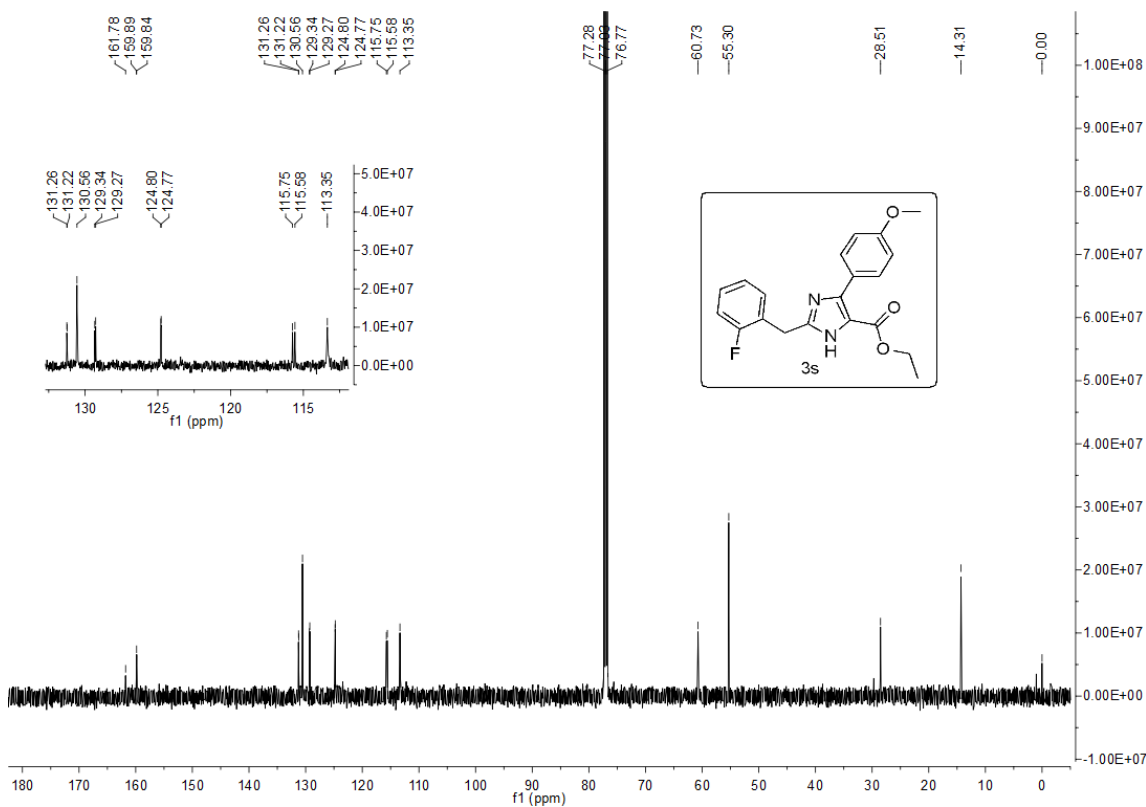

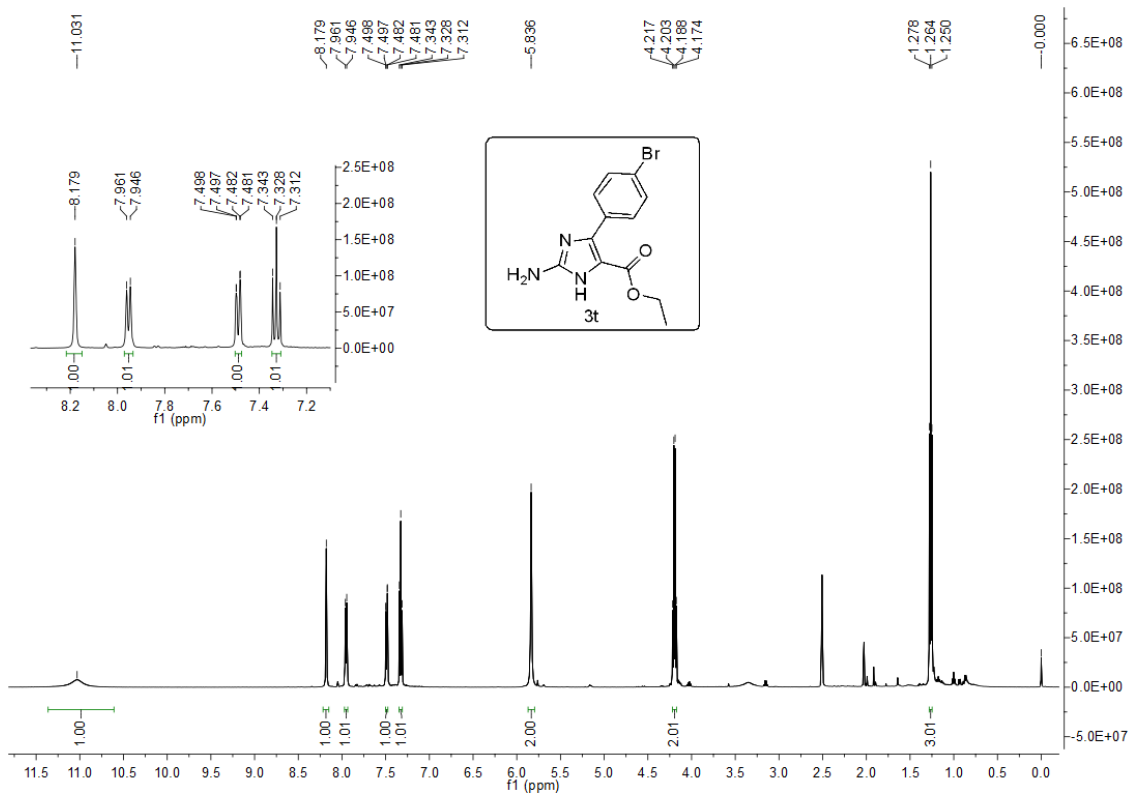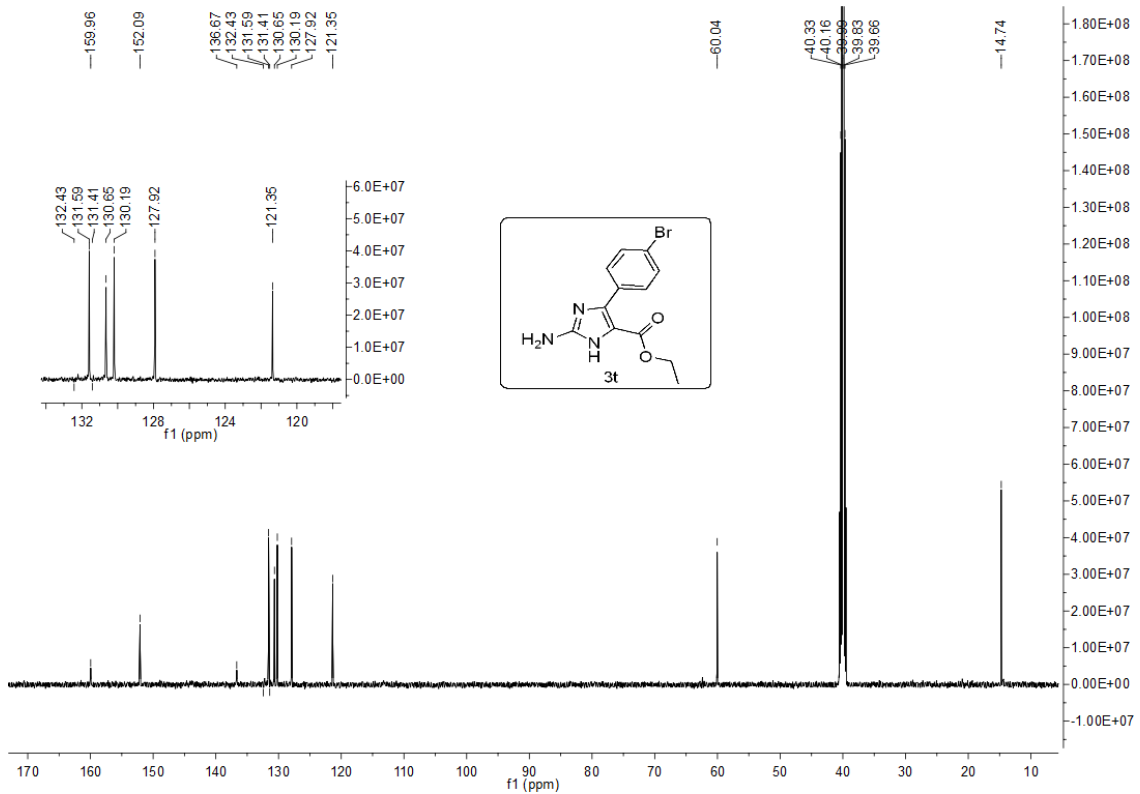

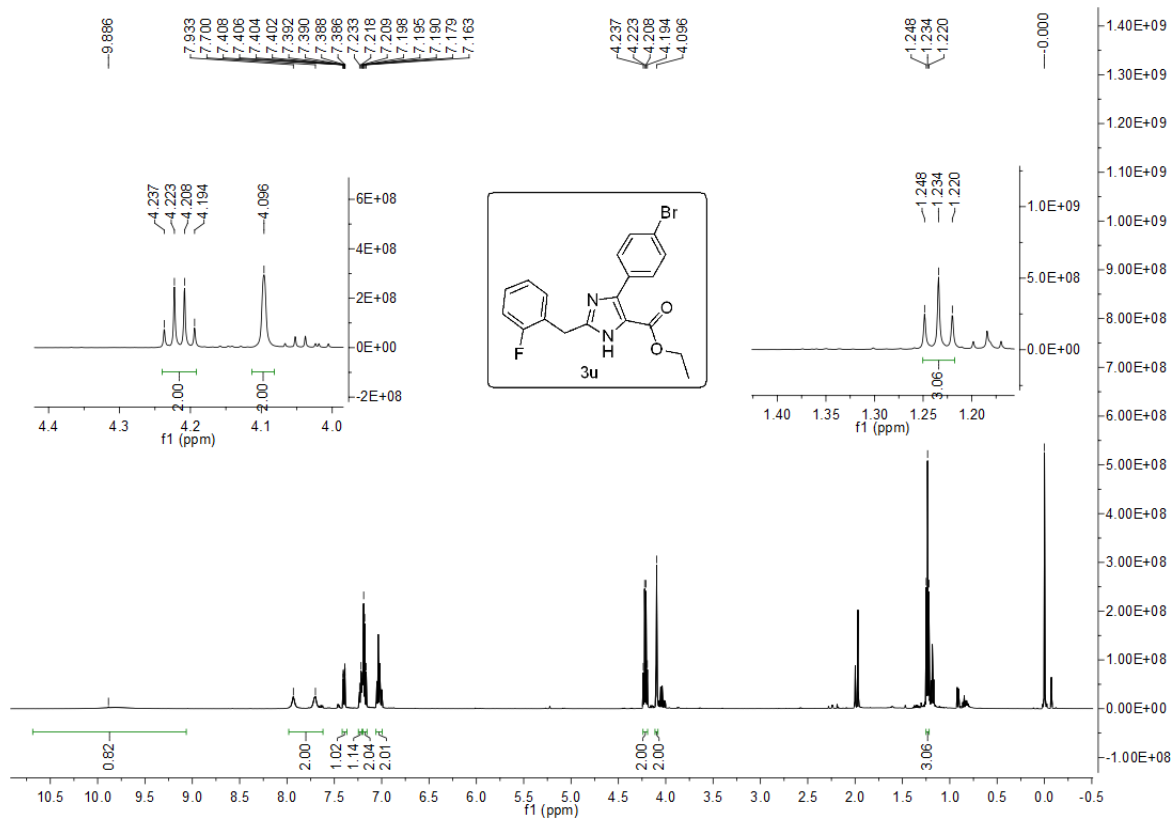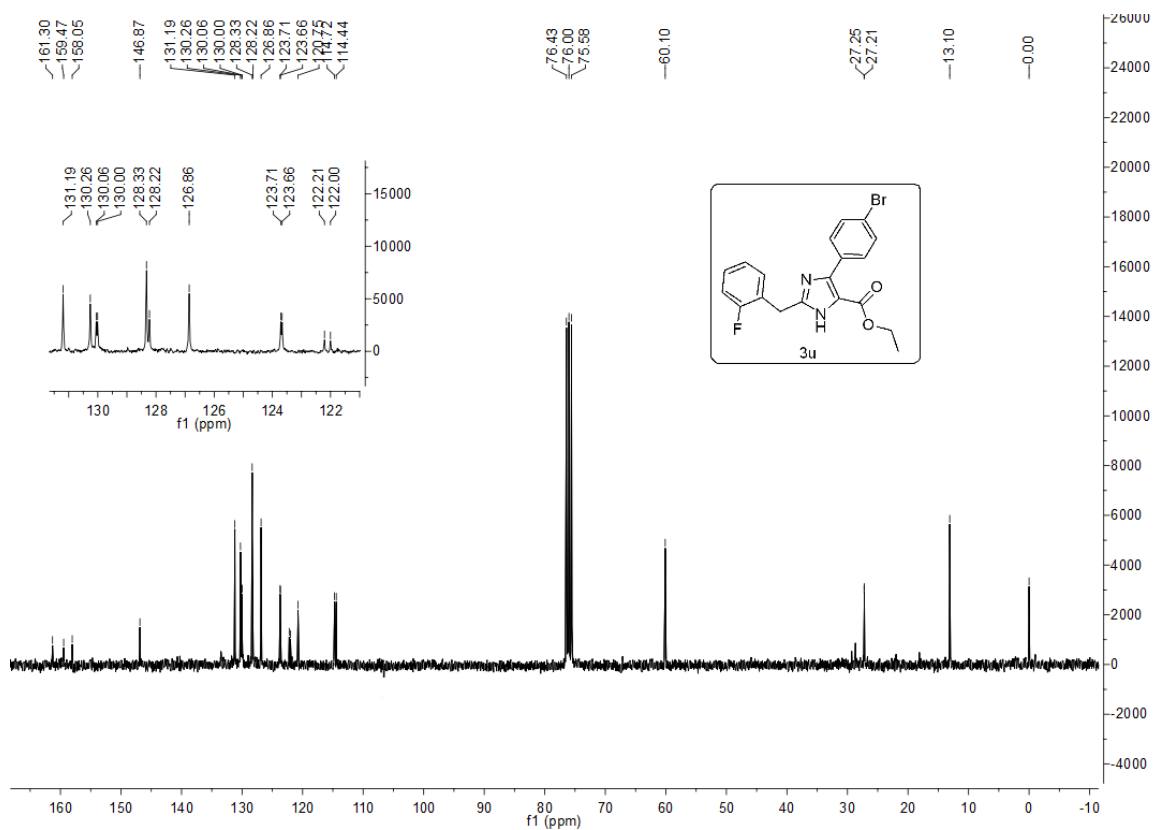

Supplement: c5ra07320k1.pdf [file c5ra07320k1.pdf]
